# Supplementary material for: New 5-LOX and 15-LOX Inhibitors Isolated from Red Sea Derived Brown Alga Sarragassum Cinnerum: An In Silico-Supported Study
Source: Research Square preprint supplement (doi:10.21203/rs.3.rs-152336/v1), 2021-01-28
Supplement: Supplementary file 1 [file 9c03996e93046f828acbb881.docx]

**SUPPLEMENTARY DATA**

**New 5-LOX and 15-LOX inhibitors isolated from red sea derived brown alga *Sarragassum cinnerum*:an *in silico*-supported study**

**Sami I. Alzarea1≠, Abeer H. Elmaidomy2≠, Hani Saber3, Arafa Musa4,5, Mohammad M. Al-Sanea6, Ehab M. Mostafa4,5, Omnia Magdy Hendawy1,7, Khayrya A. Youssif8, Abdullah S. Alanazi9, Metab Alharbi10, Ahmed M. Sayed11*, Usama Ramadan Abdelmohsen12,13***

1Department of Pharmacology, College of Pharmacy, Jouf University, Sakaka, Aljouf 72341, Saudi Arabia

2Department of Pharmacognosy, Faculty of Pharmacy, Beni-Suef University, Beni-Suef 62511, Egypt

3Department of Botany and Microbiology, Faculty of Science, South Valley University, 83523, Qena, Egypt

4Department of Pharmacognosy, College of Pharmacy, Jouf University 72341, Sakaka, Saudi Arabia

5Department of Pharmacognosy, Faculty of Pharmacy, Al-Azhar University, Cairo, 11371, Egypt

6Department of Pharmaceutical Chemistry, College of Pharmacy, Jouf University 72341, Sakaka, Saudi Arabia

7Clinical Pharmacology Department, Faculty of Medicine, Beni-Suef University, Egypt

8Department of Pharmacognosy, Faculty of Pharmacy, Modern University for Technology and Information, Cairo, Egypt

9Clinical Pharmacy Department, College of Pharmacy, Jouf University, Sakaka, Aljouf 72341, Saudi Arabia

10Department of Pharmacology and Toxicology, College of Pharmacy, King Saud University, P.O. Box 2457, Riyadh, 11451, Saudi Arabia.

11Department of Pharmacognosy, Faculty of Pharmacy, Nahda University, 62513, Beni-Suef, Egypt

12Department of Pharmacognosy, Faculty of Pharmacy, Minia University, Minia 61519, Egypt

13Department of Pharmacognosy, Faculty of Pharmacy, Deraya University, 7 Universities Zone, New Minia 61111, Egypt

*Corresponding authors: AMS: Department of Pharmacognosy, Faculty of Pharmacy, Nahda University, 62513, Beni-Suef, Egypt, [ahmed.mohamed.sayed@nub.edu.eg](mailto:ahmed.mohamed.sayed@nub.edu.eg); URA: Department of Pharmacognosy, Faculty of Pharmacy, Minia University, Minia 61519, Egypt, [usama.ramadan@mu.edu.eg](mailto:usama.ramadan@mu.edu.eg).

≠ Those authors have equally contributed

ABSTRACT

*Sargassum* is a brown algal genus inhabiting tropical region. Metabolomic profiling of *Sarragassum cinnerum “*Sargassaceae*”*, dereplicated eleven compounds **1-11**, further phytochemical investigation afforded two new aryl cresol **12-13**, along with eight known compounds **14-21**. Both new metabolites along with **19** showed moderate *in vitro* antiproliferative activity against HEPG2, MCF7, and CACO2. Molecular targets of the bioactive compounds using a pharmacophore-based virtual screening, predicts 5-LOX and 15-LOX as the most probable target linked to their observed antiproliferative activity. The validation step revealed **12** and **13** inhibited 5-LOX more prudentially than 15-LOX, while **19** showed a convergent inhibitory activity toward both enzymes. Further in-depth *in silico* analysis revealed the molecular interactions inside both enzymes active sites and explained the varying inhibitory activity for **12**, and **13** toward 5-LOX and 15-LOX. Taken together, unique metabolites in *S. cinnerum* had potential anticancer activity supported with *in-silico* investigations to facility drug discovery and development processes.

**Keywords:** *Sarragassum cinnerum*, metabolic profiling, aryl cresols, docking, 5- LOX, 15-LOX, virtual screening, *in silico*.

**List of Contents**

| **Table S1.** | Dereplicated metabolites from LC-HRESIMS analysis of *Sarragassum cinnerum* |
| --- | --- |
| **Figure S1.** | LC-HRESIMS Chromatogram of the dereplicated metabolites of *Sarragassum cinnerum* (positive) |
| **Figure S2.** | LC-HRESIMS Chromatogram of the dereplicated metabolites of *Sarragassum cinnerum* (negative) |
| **Figure S3**. | 1H NMR spectrum of compound **12** measured in DMSO-*d6* at 400 MHz |
| **Figure S4**. | DEPT-Q NMR spectrum of compound **12** measured in DMSO-*d6* at 100 MHz |
| **Figure S5**. | HSQC spectrum of compound **12** measured in DMSO-*d6* |
| **Figure S6**. | HMBC spectrum of compound **12** measured in DMSO-*d6* |
| **Figure S7**. | HRESIMS spectrum of compound **12** |
| **Figure S8**. | 1H NMR spectrum of compound **13** measured in DMSO-*d6* at 400 MHz |
| **Figure S9**. | DEPT-Q NMR spectrum of compound **13** measured in DMSO-*d6* at 100 MHz. |
| **Figure S10**. | HSQC spectrum of compound **13** measured in DMSO-*d6* |
| **Figure S11.** | HMBC spectrum of compound **13** measured in DMSO-*d6* |
| **Figure S12**. | HRESIMS spectrum of compound **13** |
| **Figure S13**. | 1H NMR spectrum of compound **14** measured in DMSO-*d6* at 400 MHz |
| **Figure S14**. | DEPT-Q NMR spectrum of compound **14** measured in DMSO-*d6* at 100 MHz. |
| **Figure S15**. | 1H NMR spectrum of compound **15** measured in DMSO-*d6* at 400 MHz |
| **Figure S16**. | DEPT-Q NMR spectrum of compound **15** measured in DMSO-*d6* at 100 MHz |
| **Figure S17**. | 1H NMR spectrum of compound **16** measured in DMSO-*d6* at 400 MHz |
| **Figure S18**. | DEPT-Q NMR spectrum of compound **16** measured in DMSO-*d6* at 100 MHz |
| **Figure S19**. | 1H NMR spectrum of compound **17** measured in DMSO-*d6* at 400 MHz |
| **Figure S20**. | DEPT-Q NMR spectrum of compound **17** measured in DMSO-*d6* at 100 MHz |
| **Figure S21**. | 1H NMR spectrum of compound **18** measured in CD3OD-*d4* at 400 MHz |
| **Figure S22**. | DEPT-Q NMR spectrum of compound **18** measured in CD3OD-*d6* at 100 MHz |
| **Figure S23**. | 1H NMR spectrum of compound **19** measured in CD3OD-*d4* at 400 MHz |
| **Figure S24**. | DEPT-Q NMR spectrum of compound **19** measured in CD3OD-*d6* at 100 MHz |
| **Figure S25**. | 1H NMR spectrum of compound **20** measured in DMSO-*d6* at 400 MHz |
| **Figure S26**. | DEPT-Q NMR spectrum of compound **20** measured in DMSO-*d6* at 100 MHz |
| **Figure S27**. | 1H NMR spectrum of compound **21** measured in D2O at 400 MHz |
| **Figure S28**. | DEPT-Q NMR spectrum of compound **21** measured in D2O at 100 MHz |

**Table S1.** Dereplicated metabolites from LC-HRESIMS analysis of *Sarragassum cinnerum*

| No. | Metabolites name | Original source | MF | RT(min.) | *m/z* |
| --- | --- | --- | --- | --- | --- |
| 1 | (5R,7S,8S)-Communiol A | *Sargassum spp.* | C11H20O4 | 3.76288 | 215.1283 |
| 2 | Hedaol A | *Sargassum spp.* | C18H30O2 | 6.7354 | 277.2162 |
| 3 | Arachidonic acid | *Sargassum pallidum* | C20H34O2 | 6.6166 | 307.2624 |
| 4 | Sargachromanol A | *Sargassum siliquastrum* | C22H30O3 | 5.3686 | 343.2276 |
| 5 | 2-Geranylgeranyl-6-methylbenzoquinone | *Sargassum micracanthum.* | C27H38O2 | 4.4710 | 395.2950 |
| 6 | 24-Ethylcholesta-4,24(28)-dien-3,6-dione | *Sargassum carpophyllum* | C29H44O2 | 6.5544 | 425.3420 |
| 7 | Saringosterone | *Sargassum asperfolium* | C29H46O2 | 6.6324 | 427.3576 |
| 8 | Nahocol A | *Sargassum siliquastrum* | C29H42O6 | 6.6773 | 487.3060 |
| 9 | 24xi-Hydroperoxy-24-vinylcholesterol | *Sargassum carpophyllum* | C29H48O3 | 6.5615 | 445.3682 |
| 10 | Sargathunbergol A | *Sargassum thunbergii* | C27H38O6 | 5.7502 | 459.2749 |
| 11 | 1-O-(11-Hexadecenoyl)-3-0-(6'-sulfo-a-D-quinovopyranosyl) glycerol | *Sargassum hemiphyllum* | C25H46O11S | 4.4836 | 553.2681 |


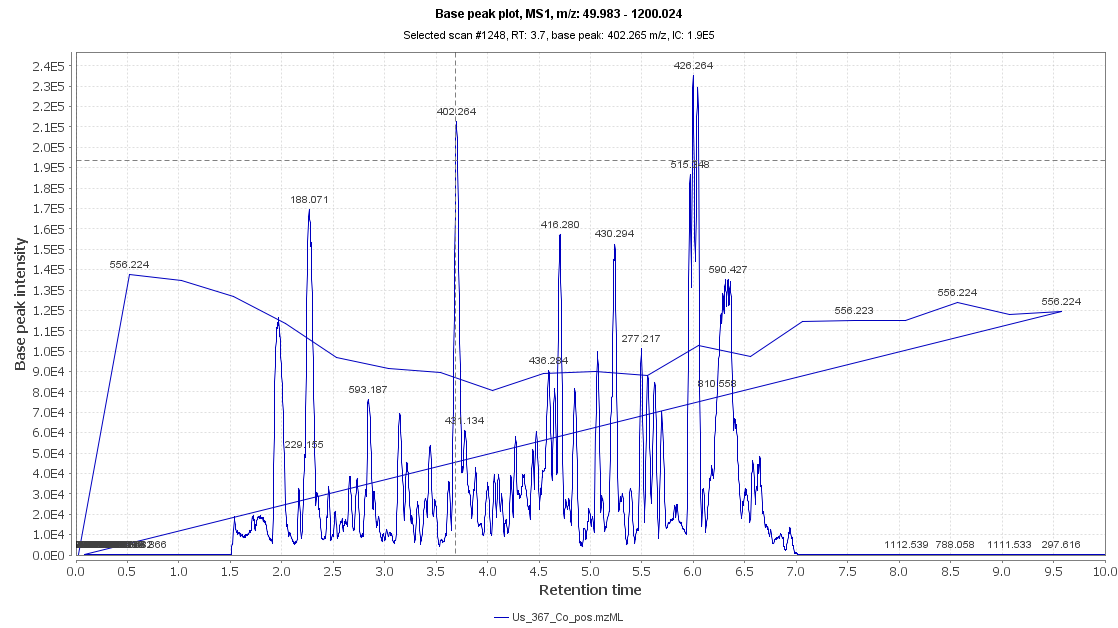


**Figure S1.** LC-HRESIMS Chromatogram of the dereplicated metabolites of *Sarragassum cinnerum* (positive)


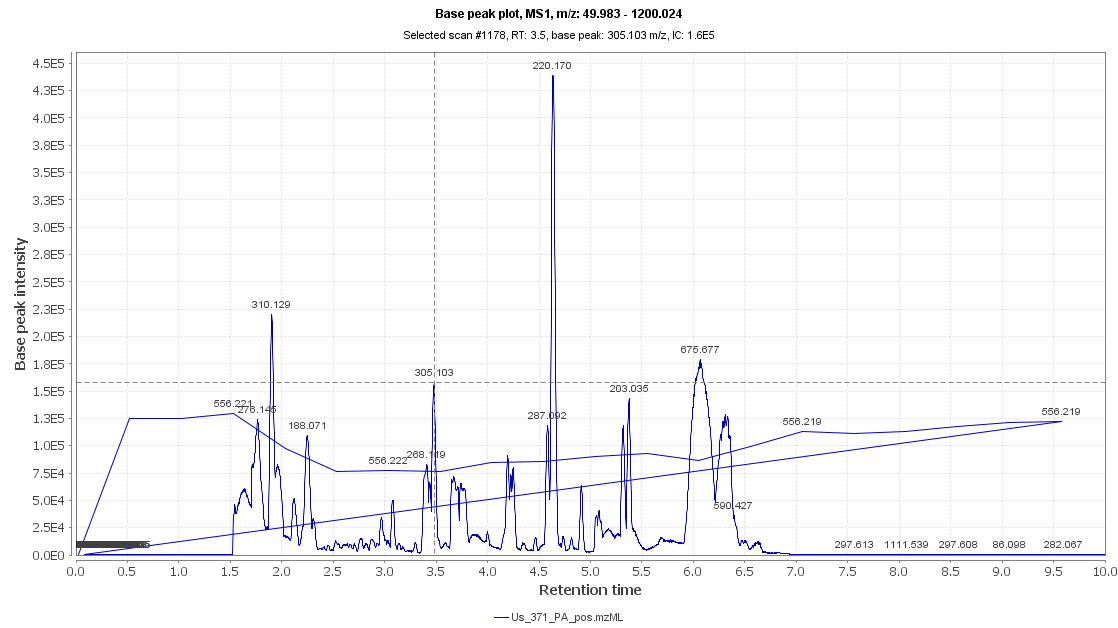


**Figure S2.** LC-HRESIMS Chromatogram of the dereplicated metabolites of *Sarragassum cinnerum* (negaive)


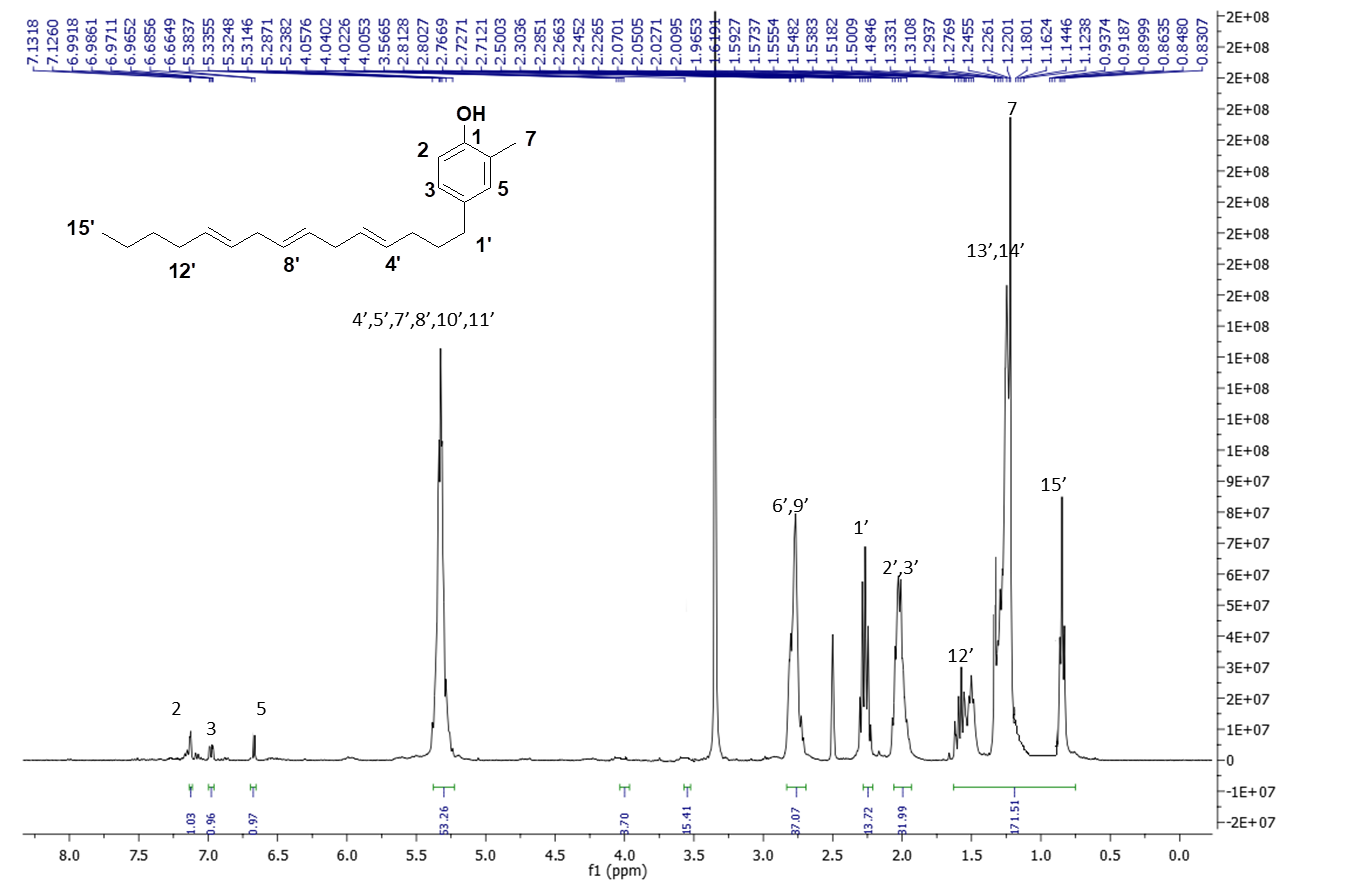


**Figure S3.** 1H NMR spectrum of compound **12** measured in DMSO-*d6* at 400 MHz


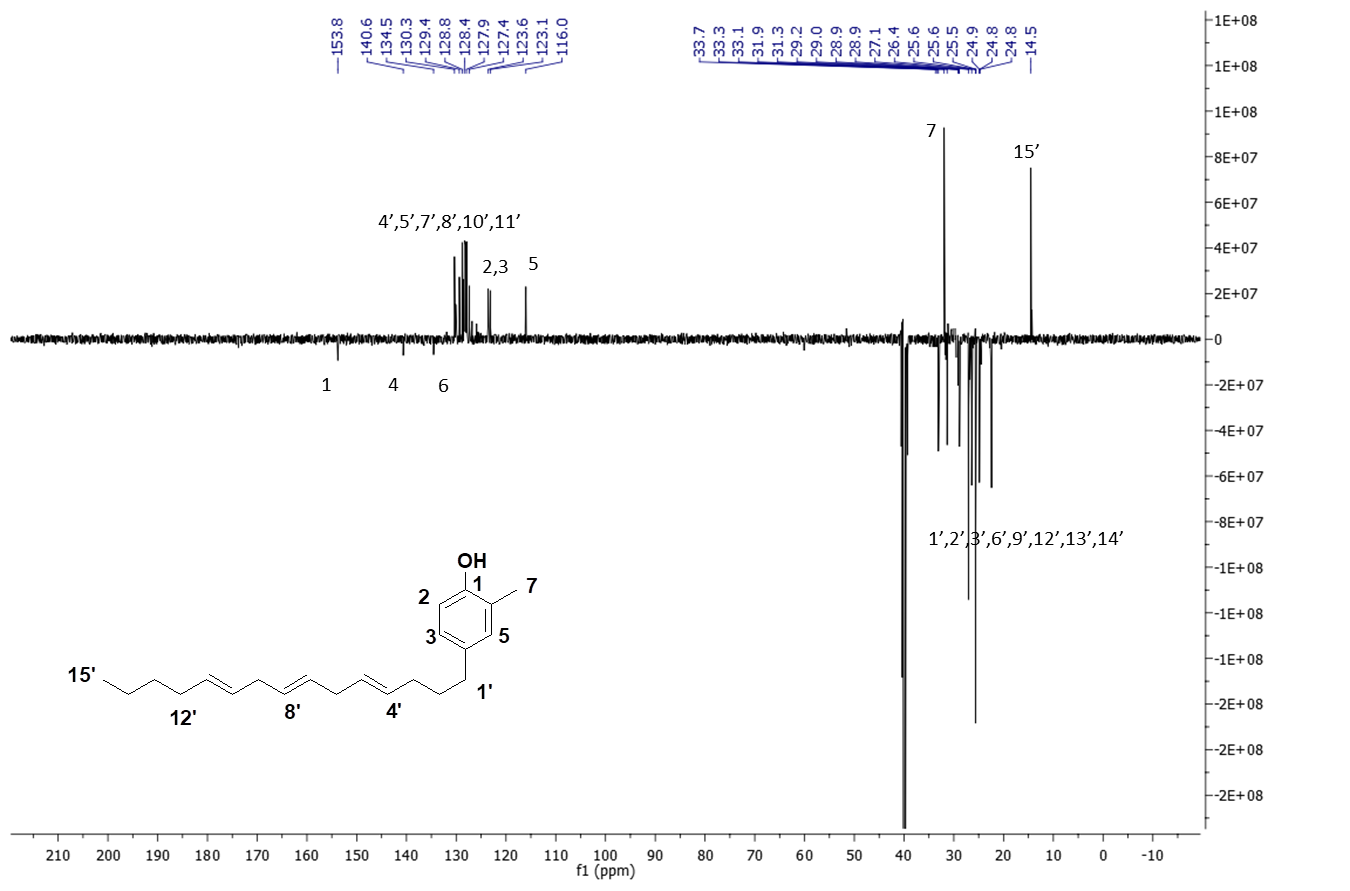


**Figure S4.** DEPT-Q NMR spectrum of compound **12** measured in DMSO-*d6* at 100 MHz.


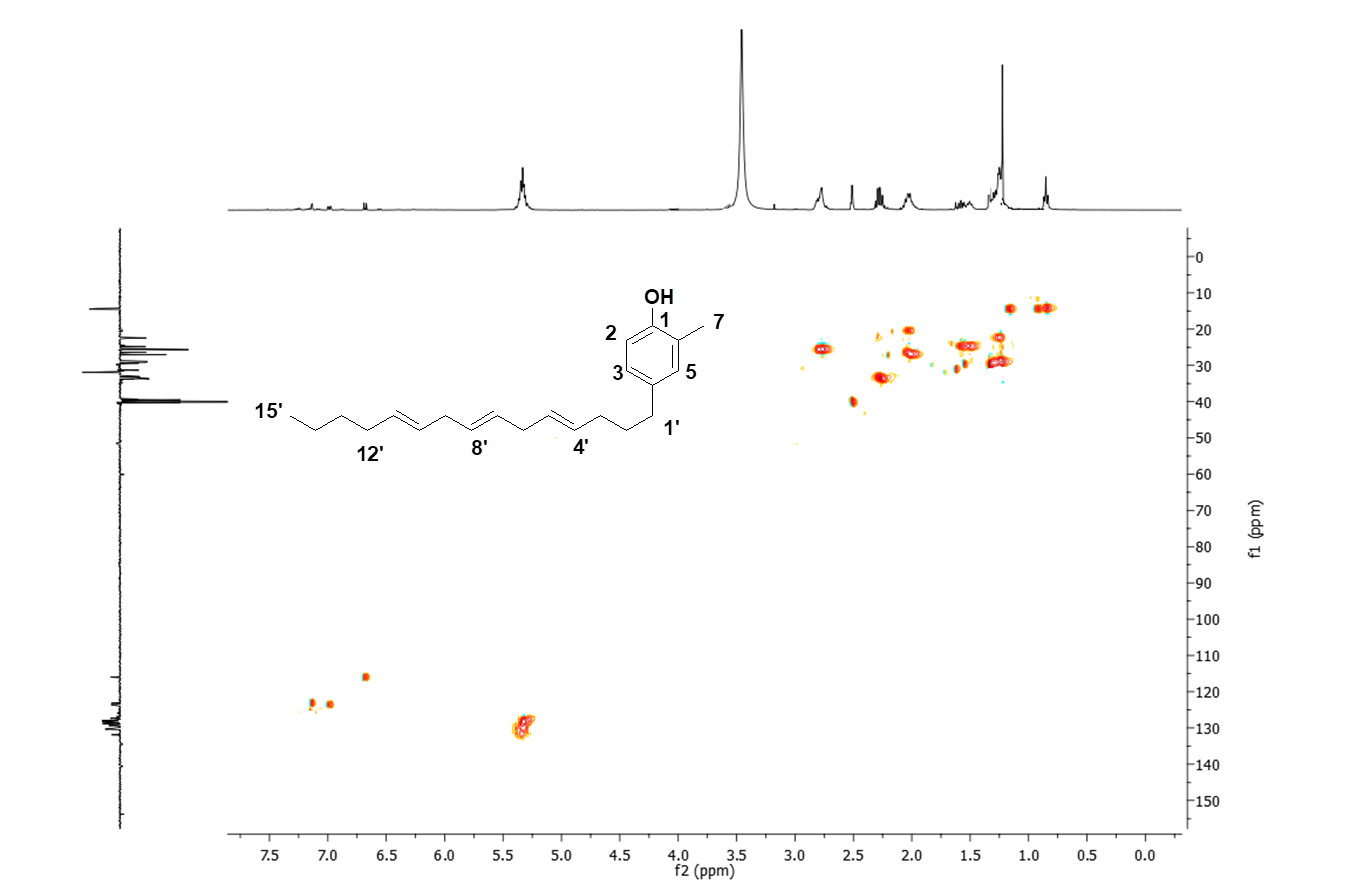


**Figure S5.** HSQC spectrum of compound **12** measured in DMSO-*d6*


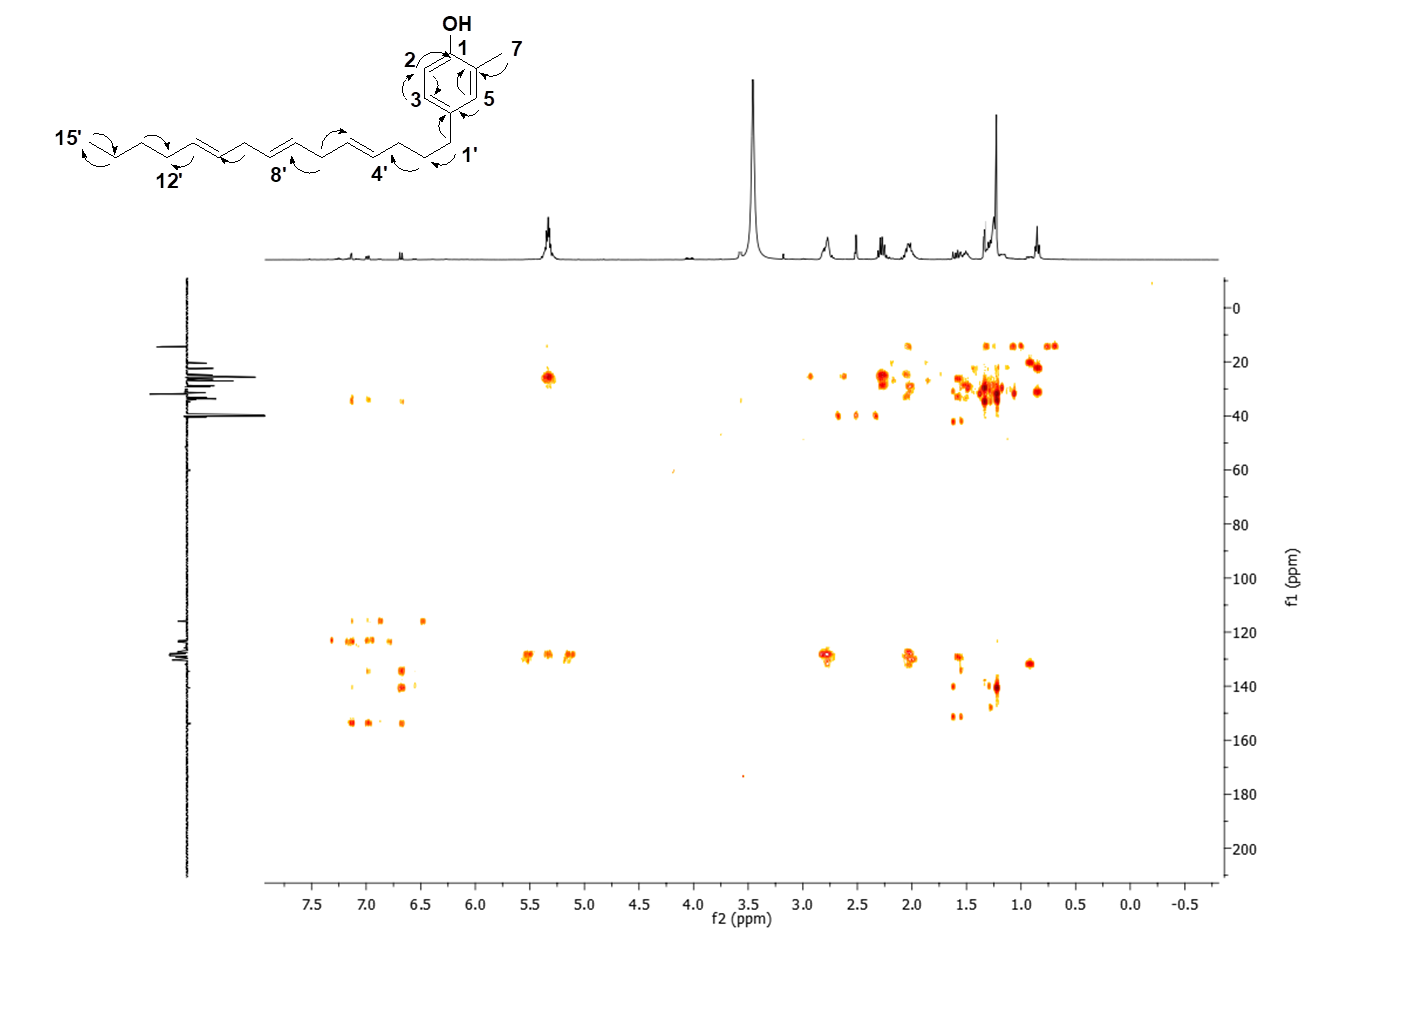


**Figure S6.** HMBC spectrum of compound **12** measured in DMSO-*d6*

**
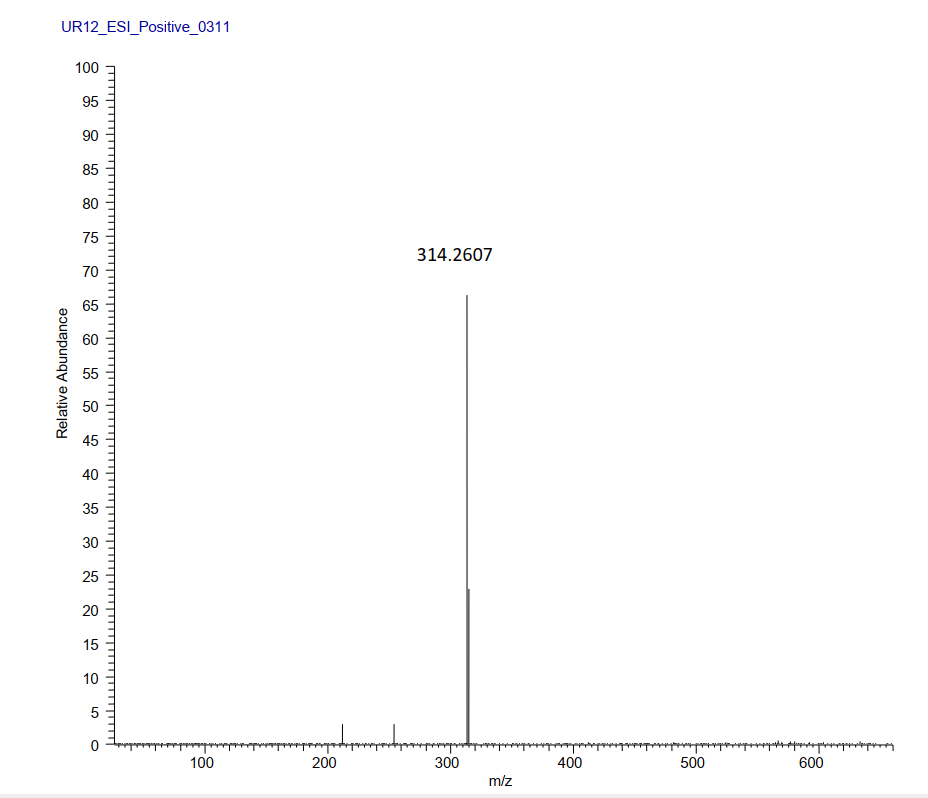
**

**Figure S7.** HRESIMS spectrum of compound **12**


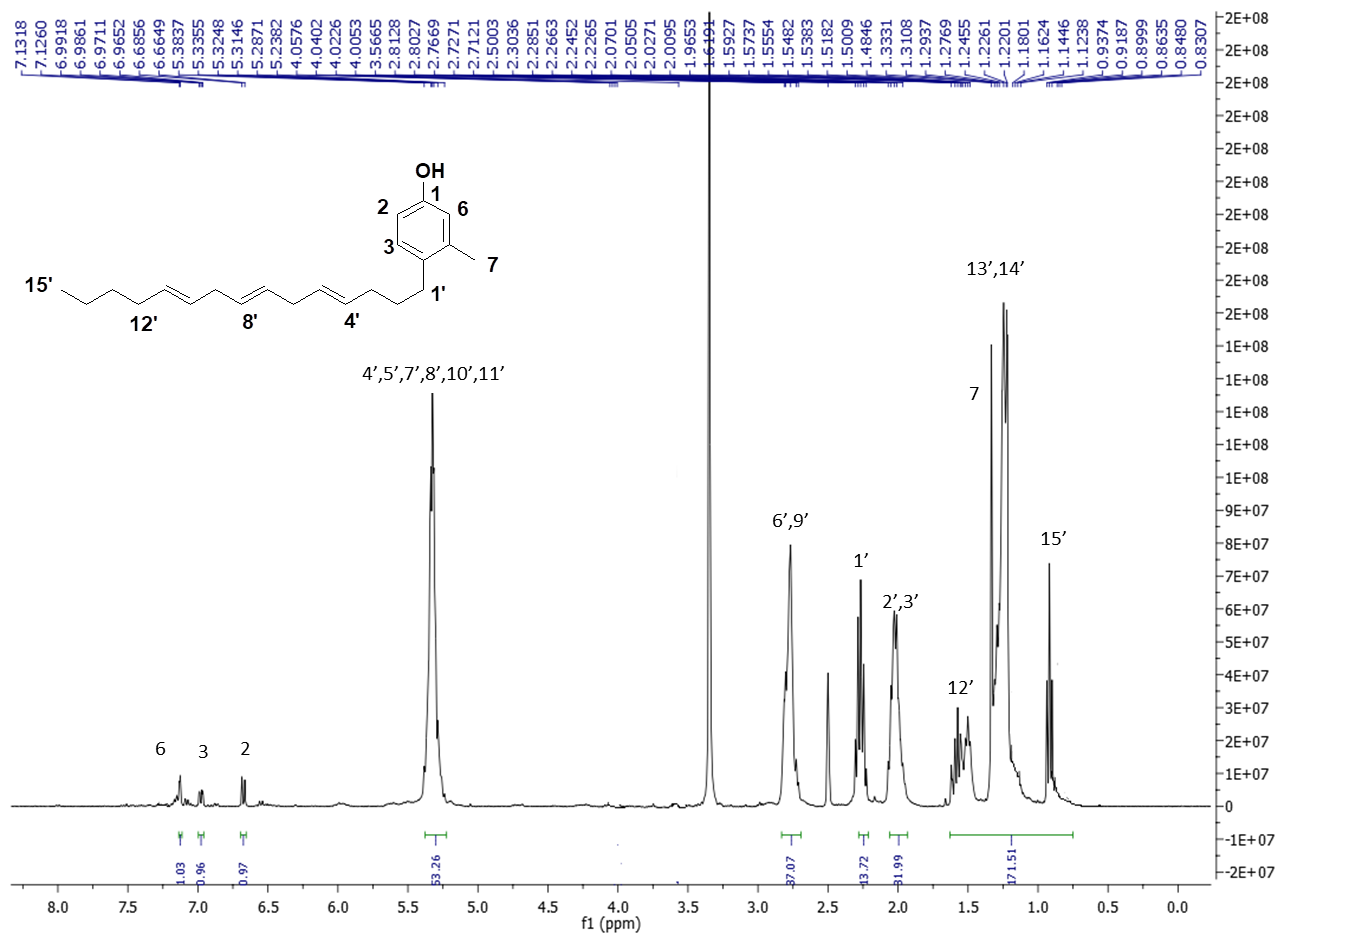


**Figure S8.** 1H NMR spectrum of compound **13** measured in DMSO-*d6* at 400 MHz


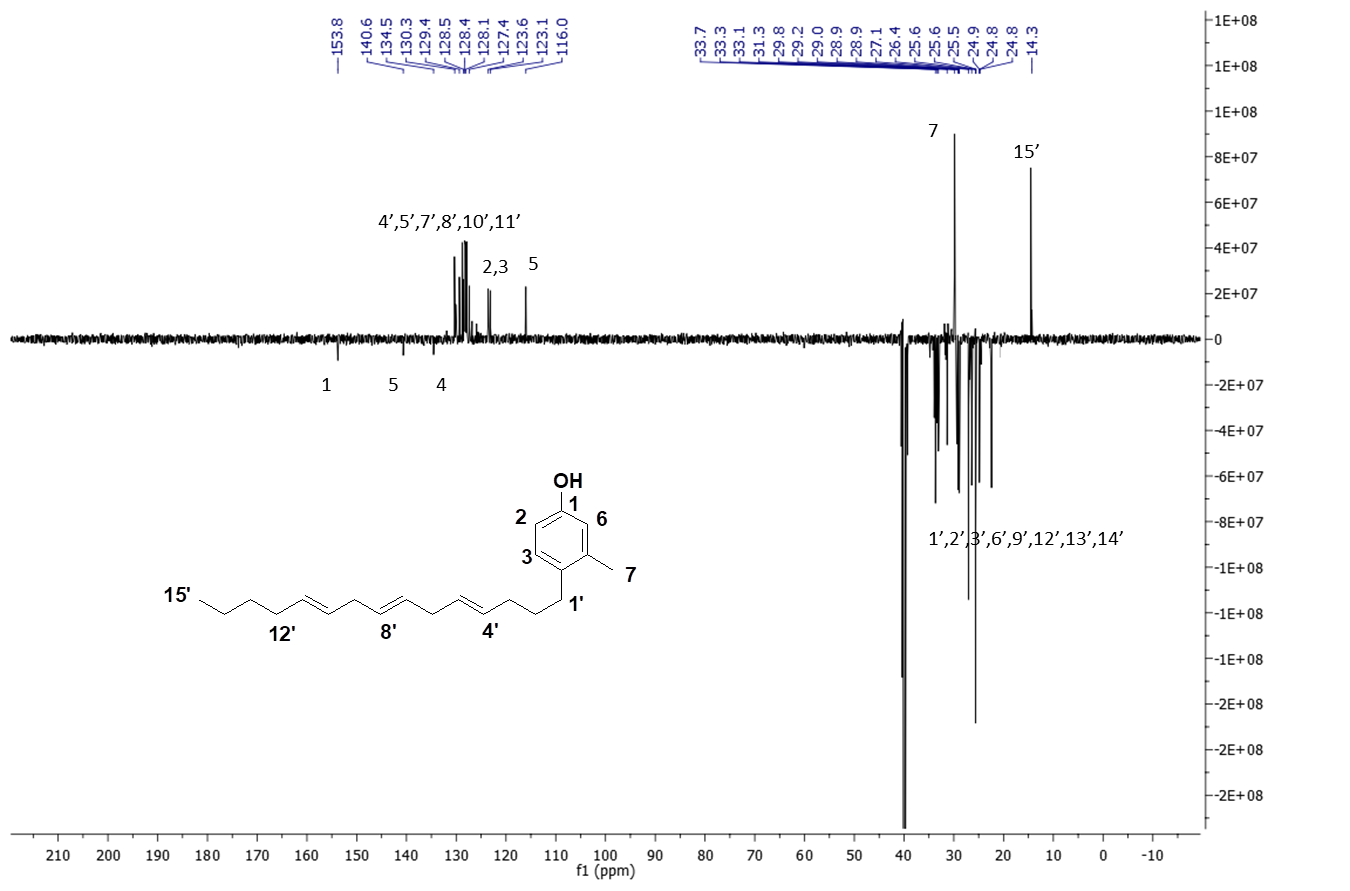


**Figure S9.** DEPT-Q NMR spectrum of compound **13** measured in DMSO-*d6* at 100 MHz.


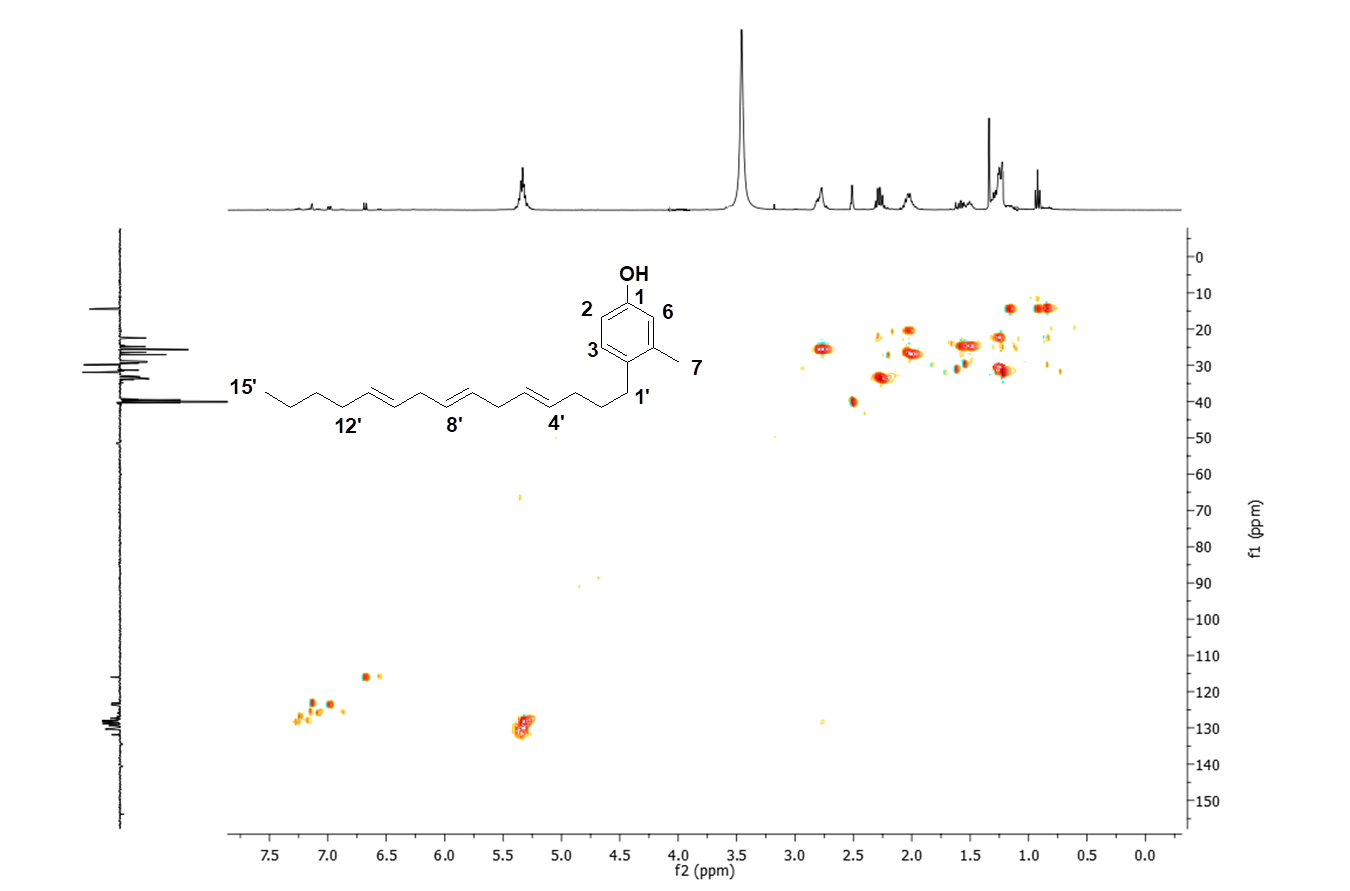


**Figure S10.** HSQC spectrum of compound **13** measured in DMSO-*d6*


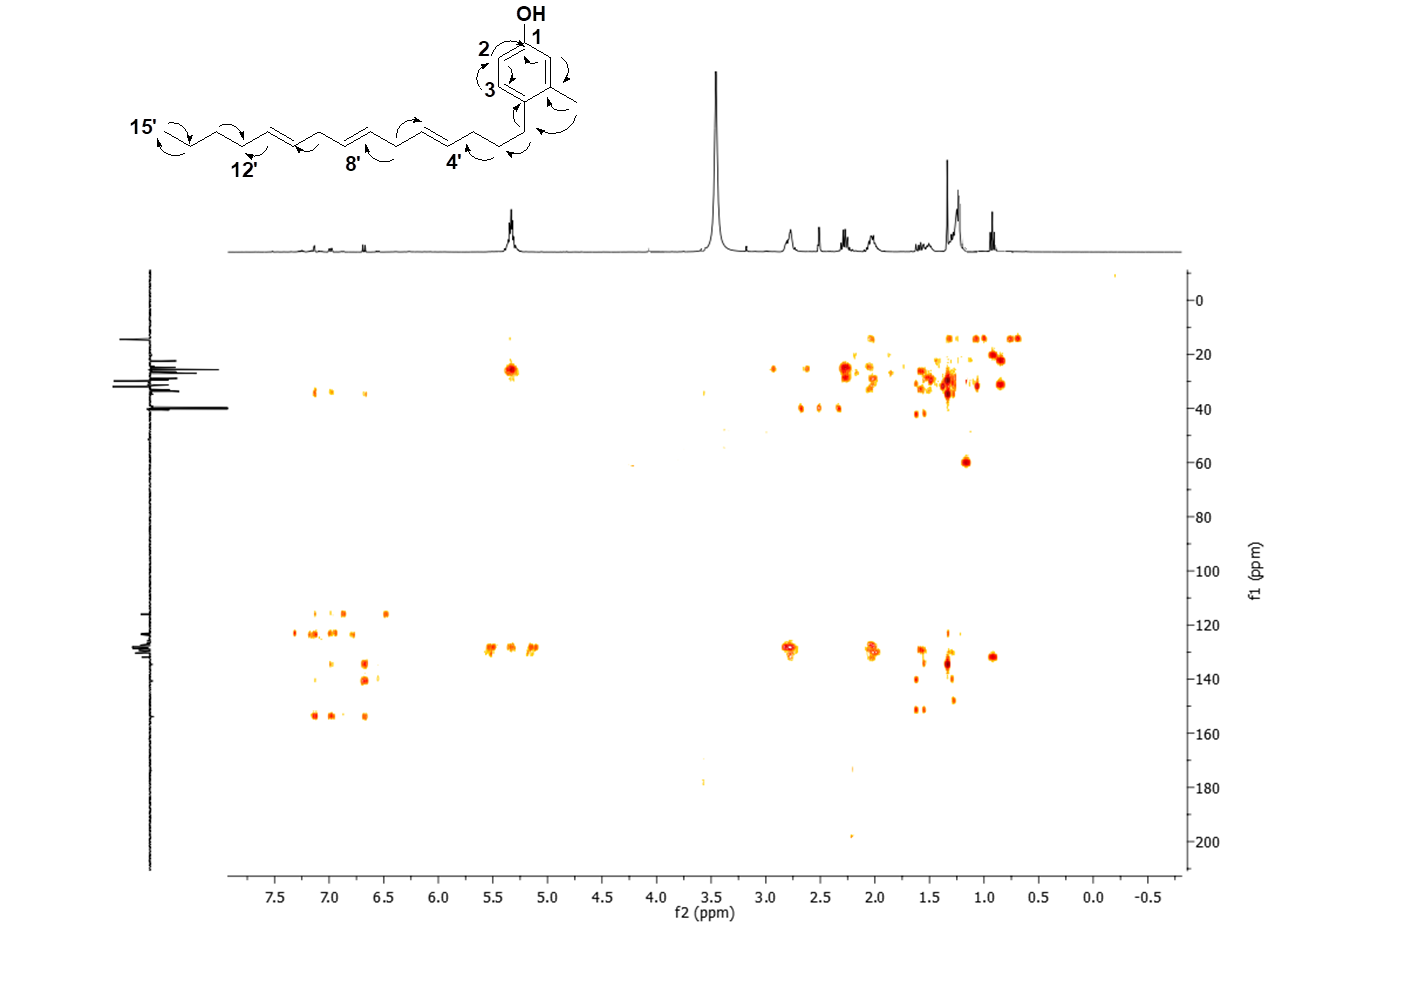


**Figure S11.** HMBC spectrum of compound **13** measured in DMSO-*d6*

**
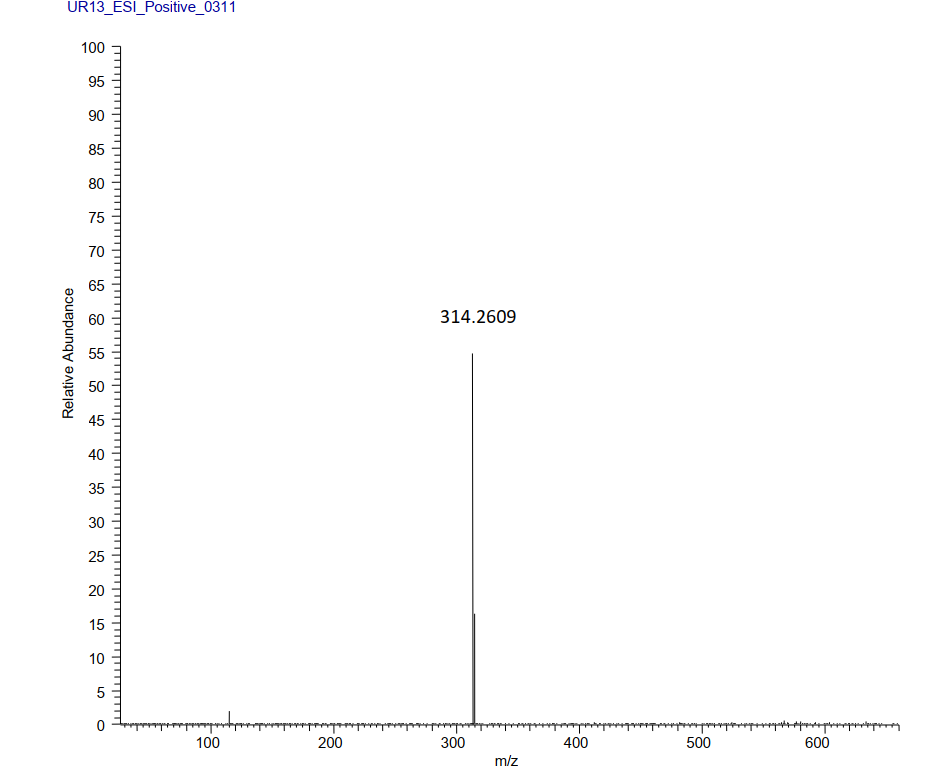
**

**Figure S12.** HRESIMS spectrum of compound **13**


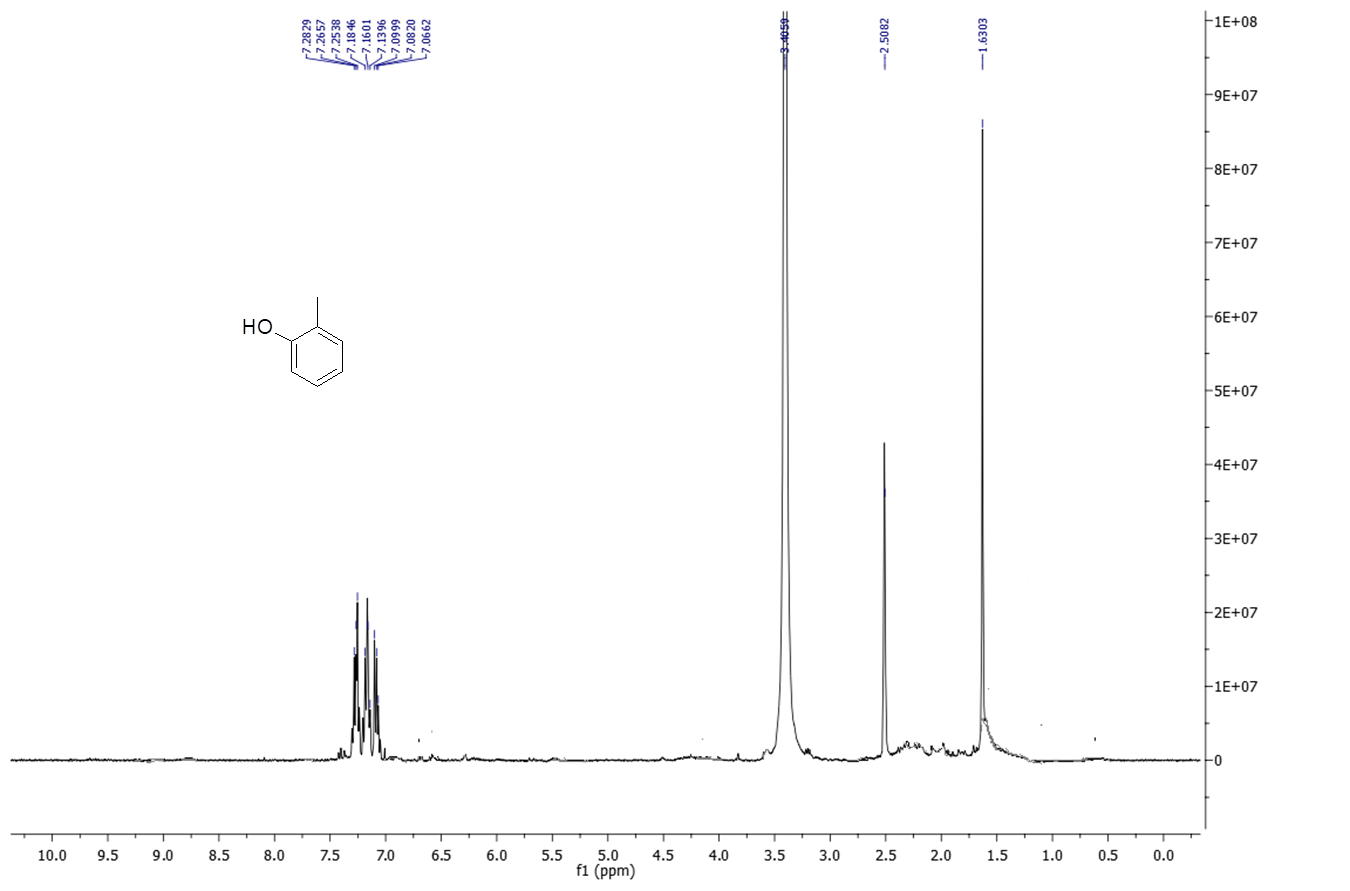


**Figure S13.** 1H NMR spectrum of compound **14** measured in DMSO-*d6* at 400 MHz


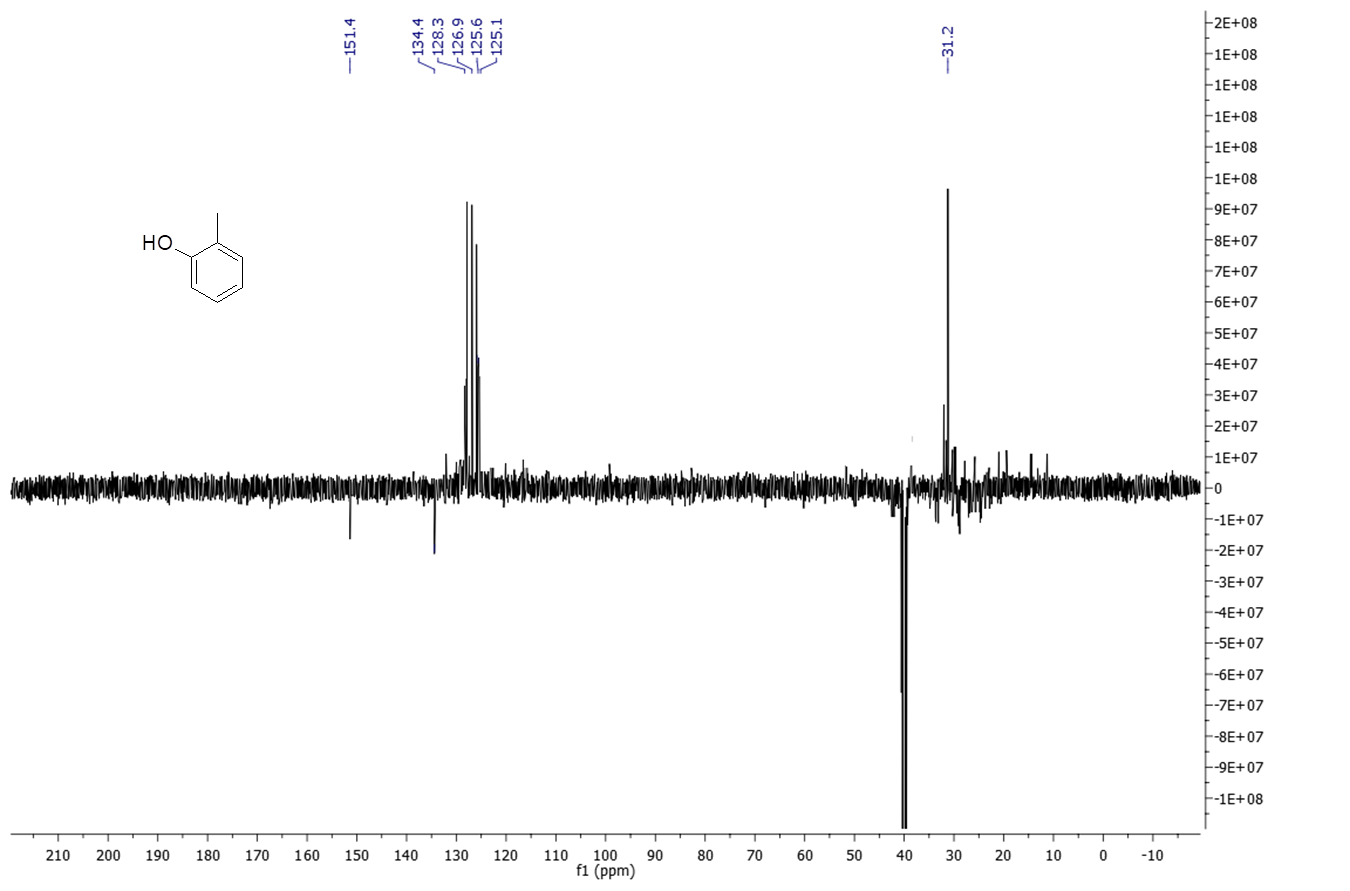


**Figure S14.** DEPT-Q NMR spectrum of compound **14** measured in DMSO-*d6* at 100 MHz.


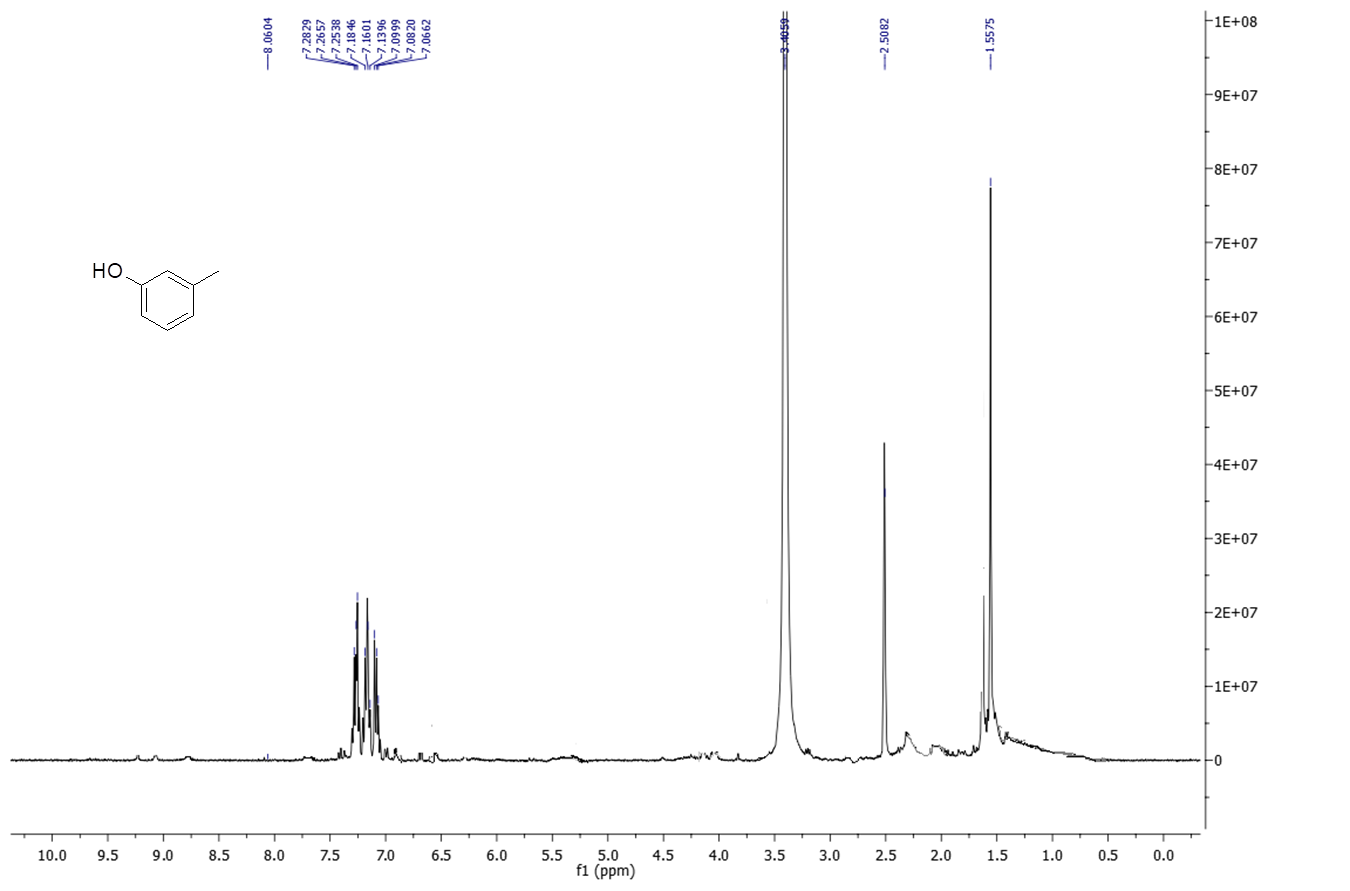


**Figure S15.** 1H NMR spectrum of compound **15** measured in DMSO-*d6* at 400 MHz


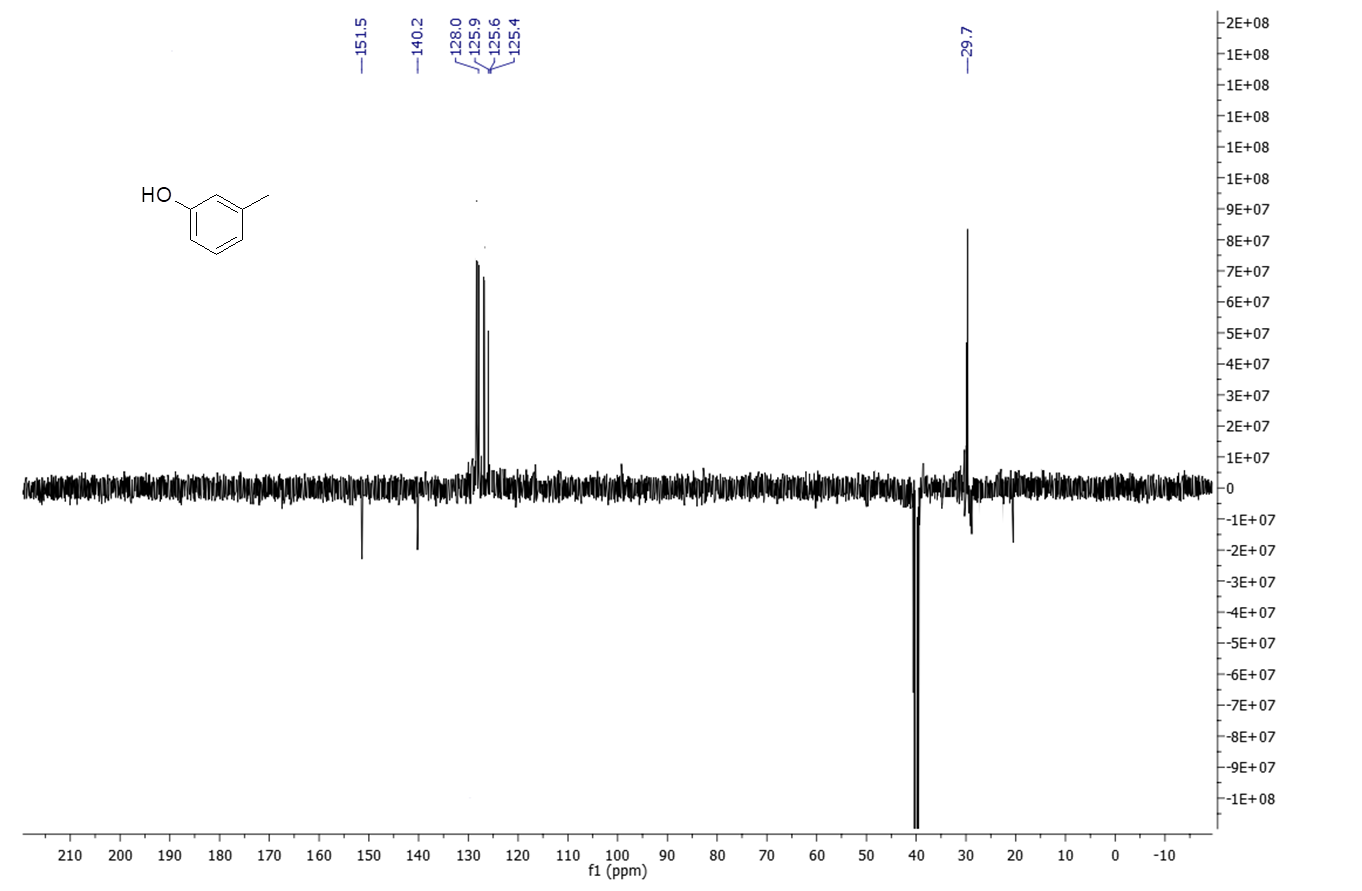


**Figure S16.** DEPT-Q NMR spectrum of compound **15** measured in DMSO-*d6* at 100 MHz


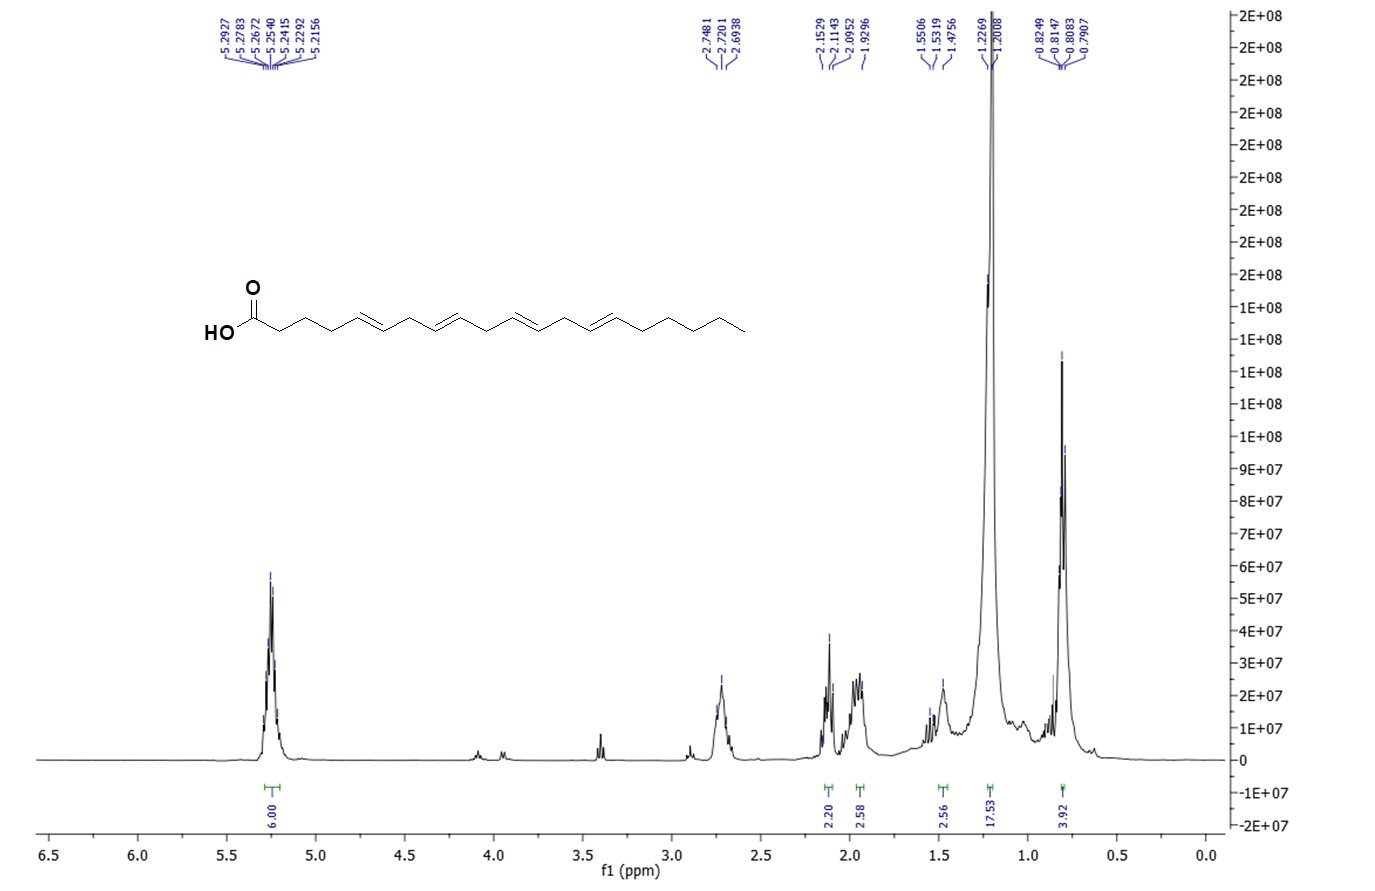


**Figure S17.** 1H NMR spectrum of compound **16** measured in DMSO-*d6* at 400 MHz


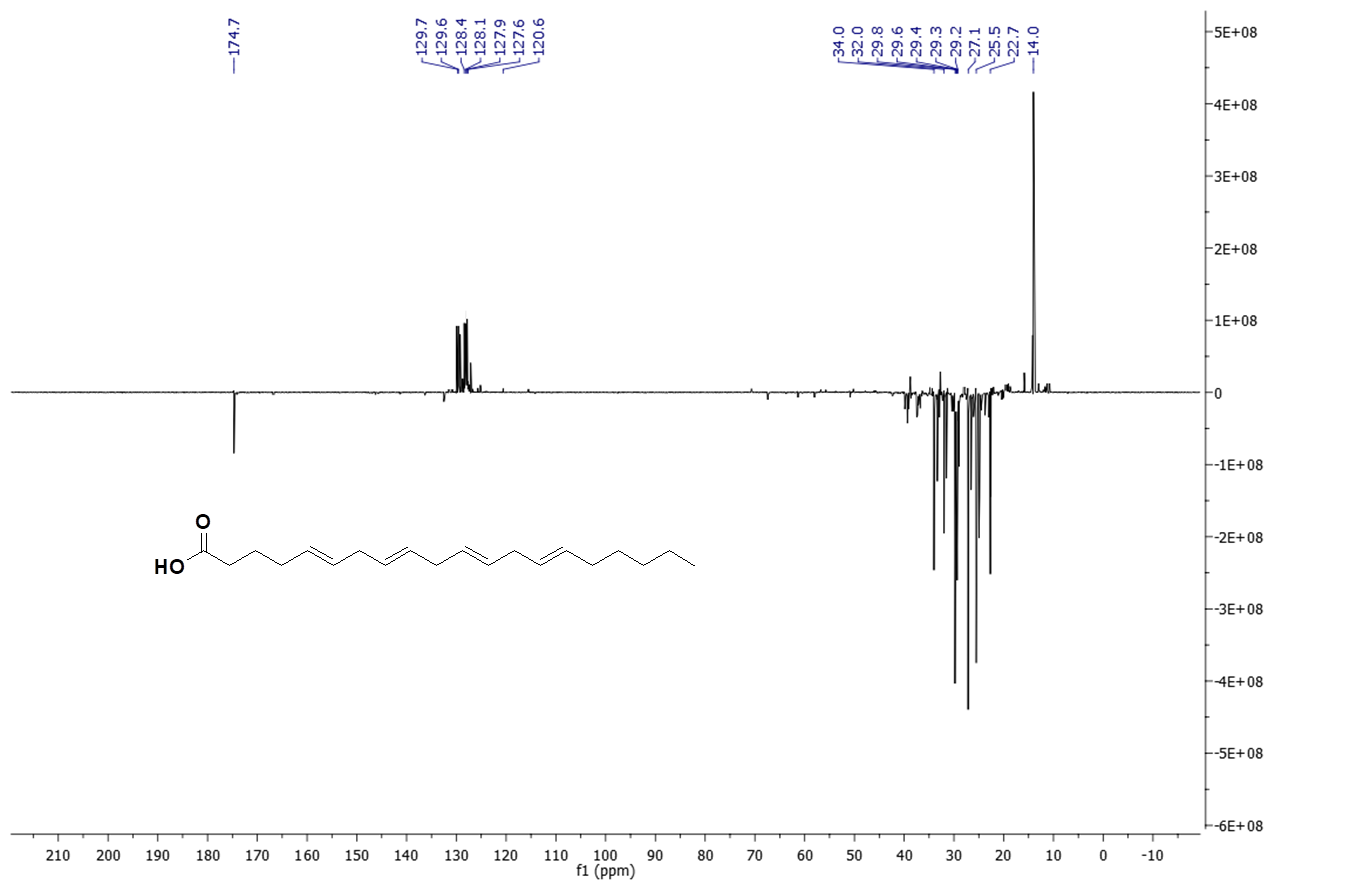


**Figure S18.** DEPT-Q NMR spectrum of compound **16** measured in DMSO-*d6* at 100 MHz


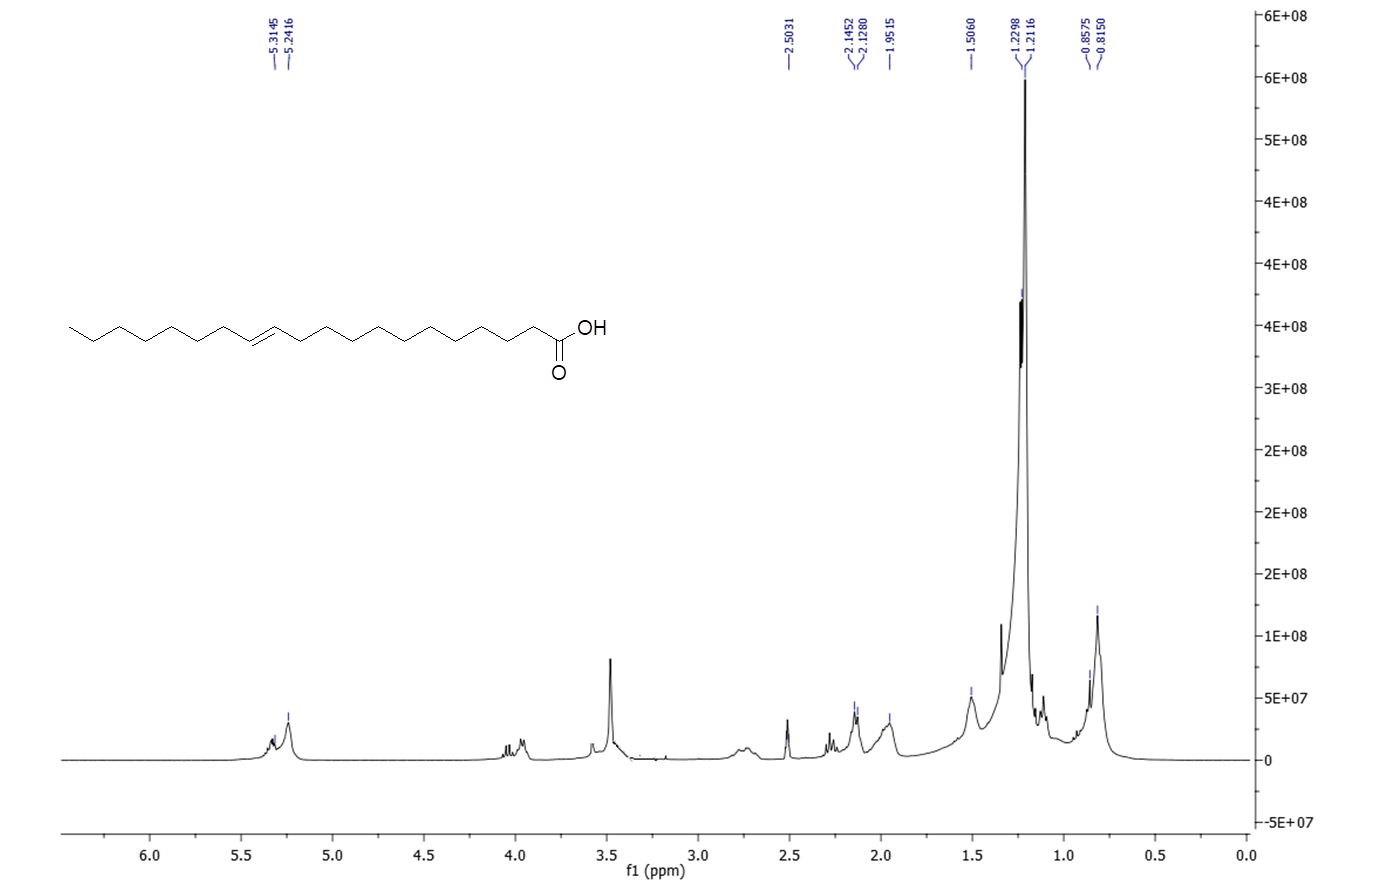


**Figure S19.** 1H NMR spectrum of compound **17** measured in DMSO-*d6* at 400 MHz


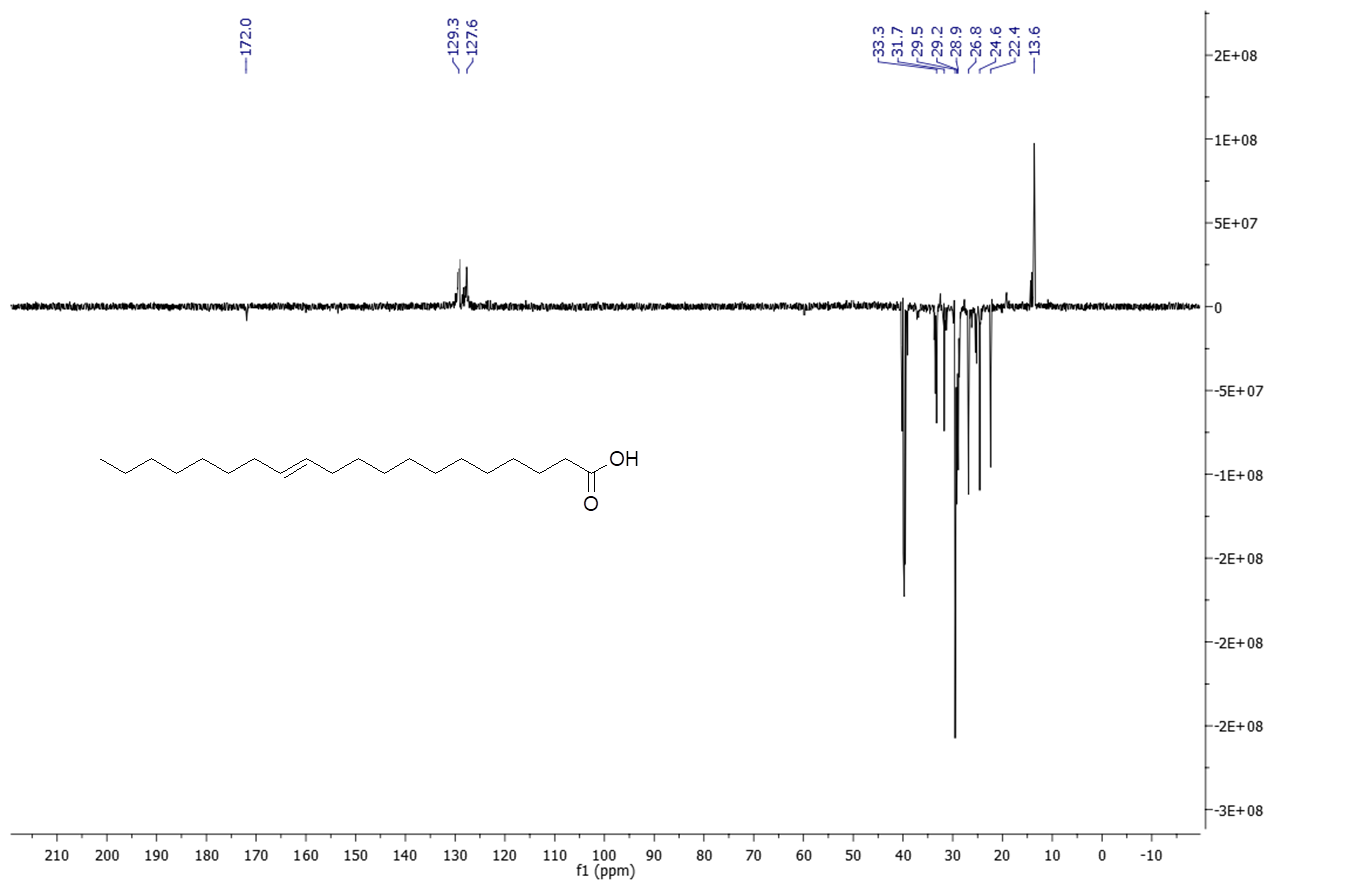


**Figure S20.** DEPT-Q NMR spectrum of compound **17** measured in DMSO-*d6* at 100 MHz


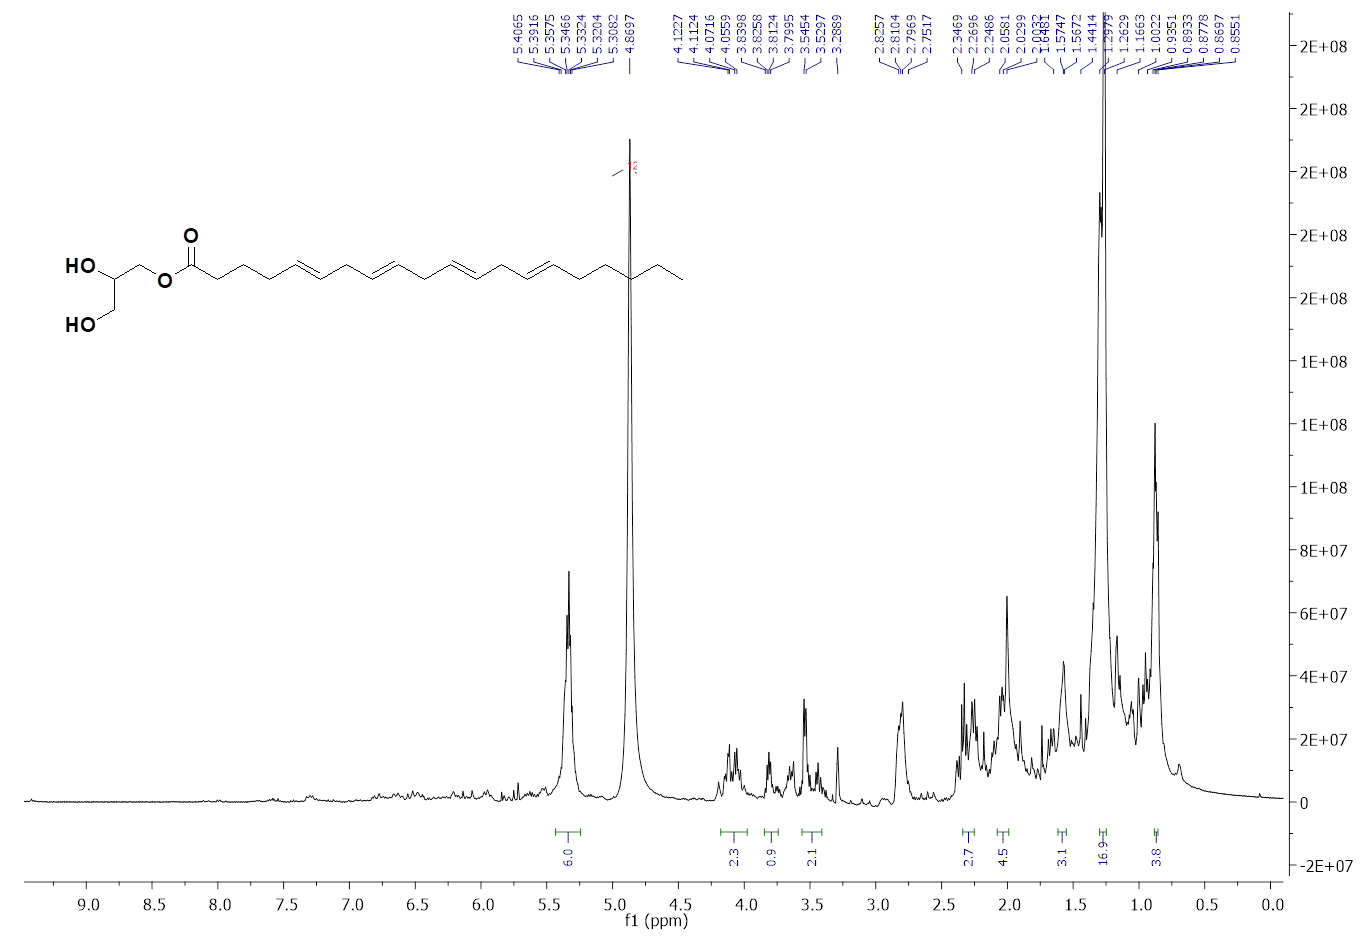


**Figure S21.** 1H NMR spectrum of compound **18** measured in CD3OD-*d4* at 400 MHz


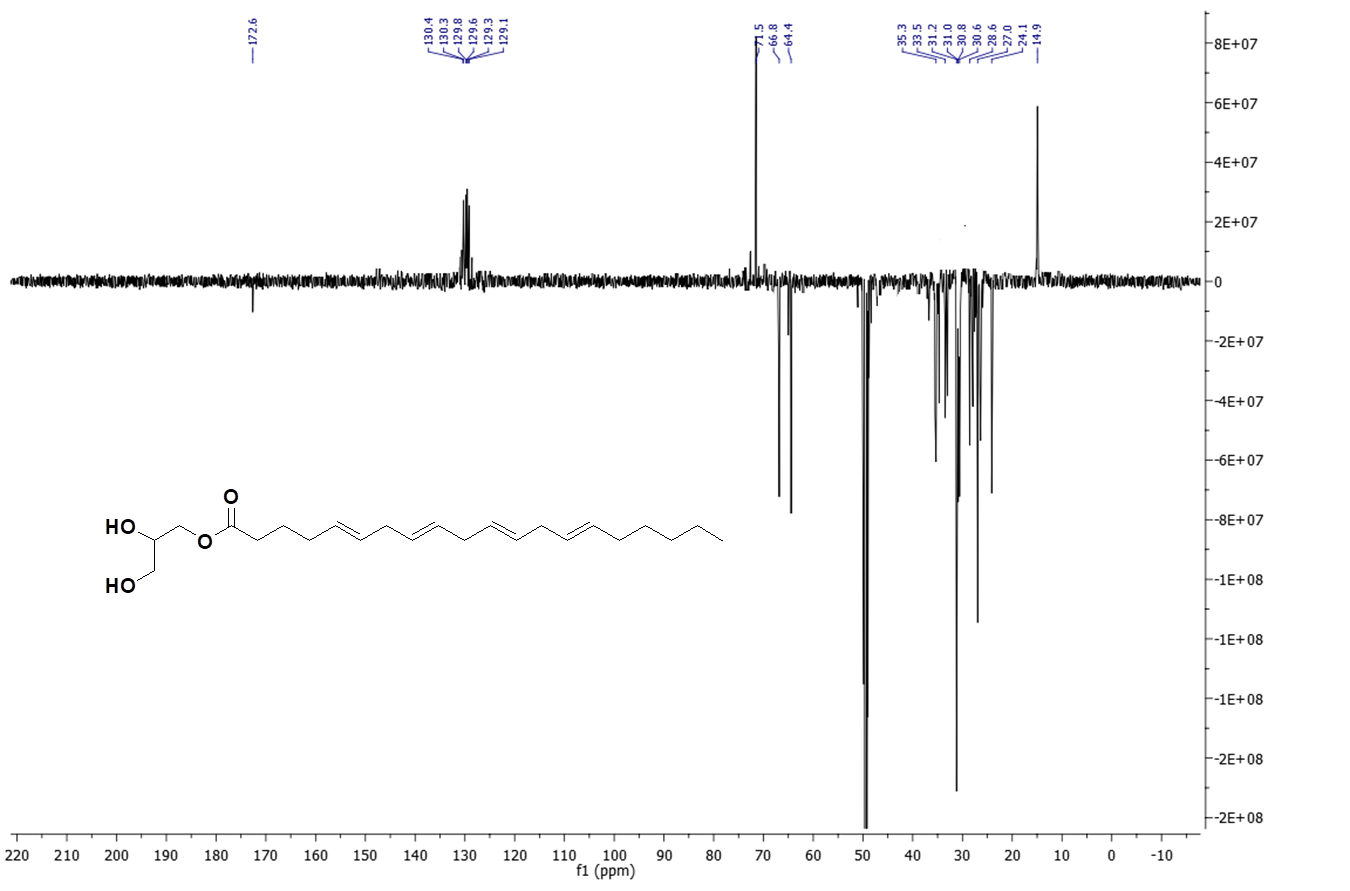


**Figure S22.** DEPT-Q NMR spectrum of compound **18** measured in CD3OD-*d6* at 100 MHz


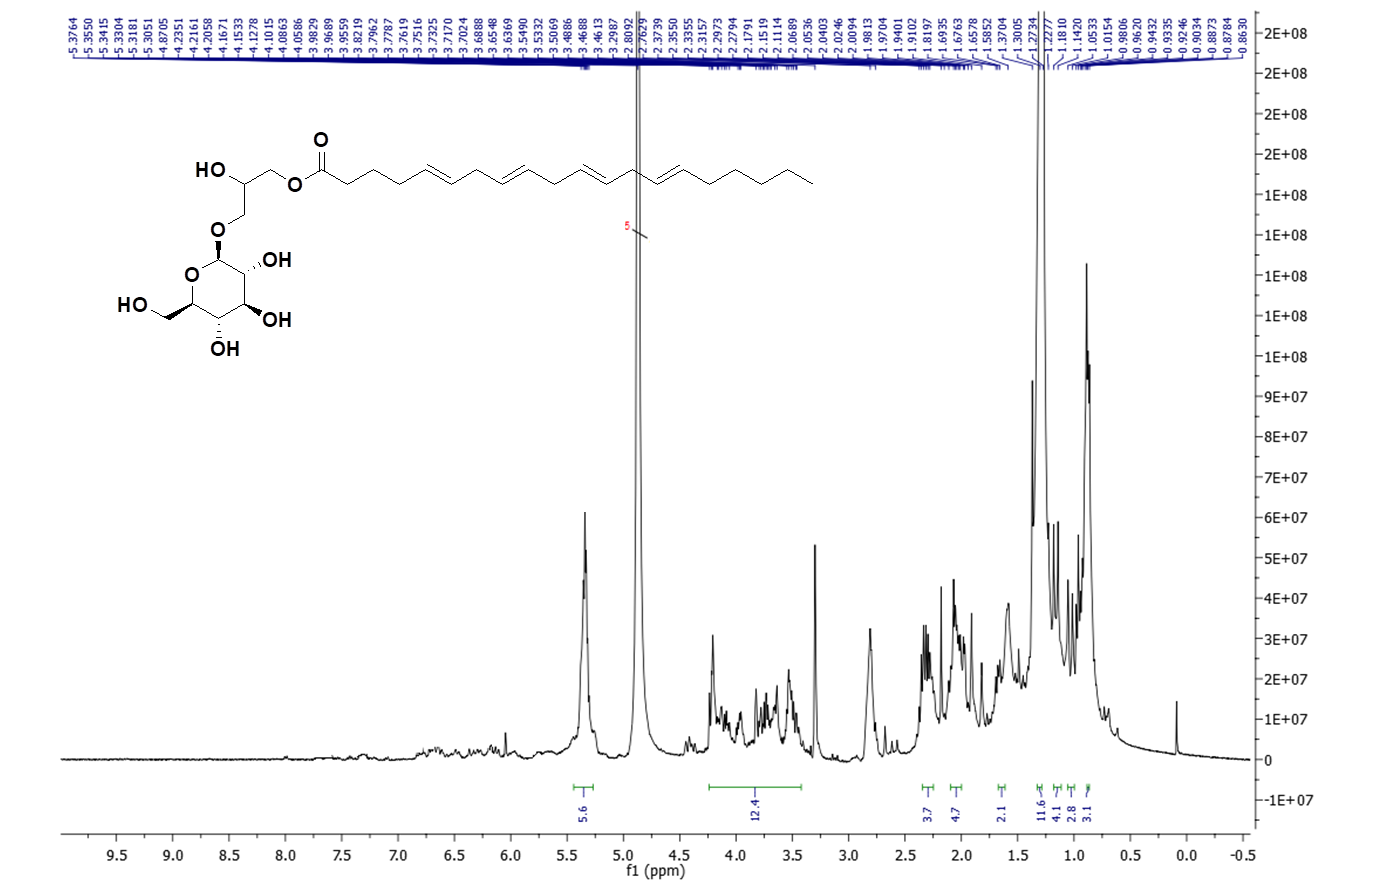


**Figure S23.** 1H NMR spectrum of compound **19** measured in CD3OD-*d4* at 400 MHz


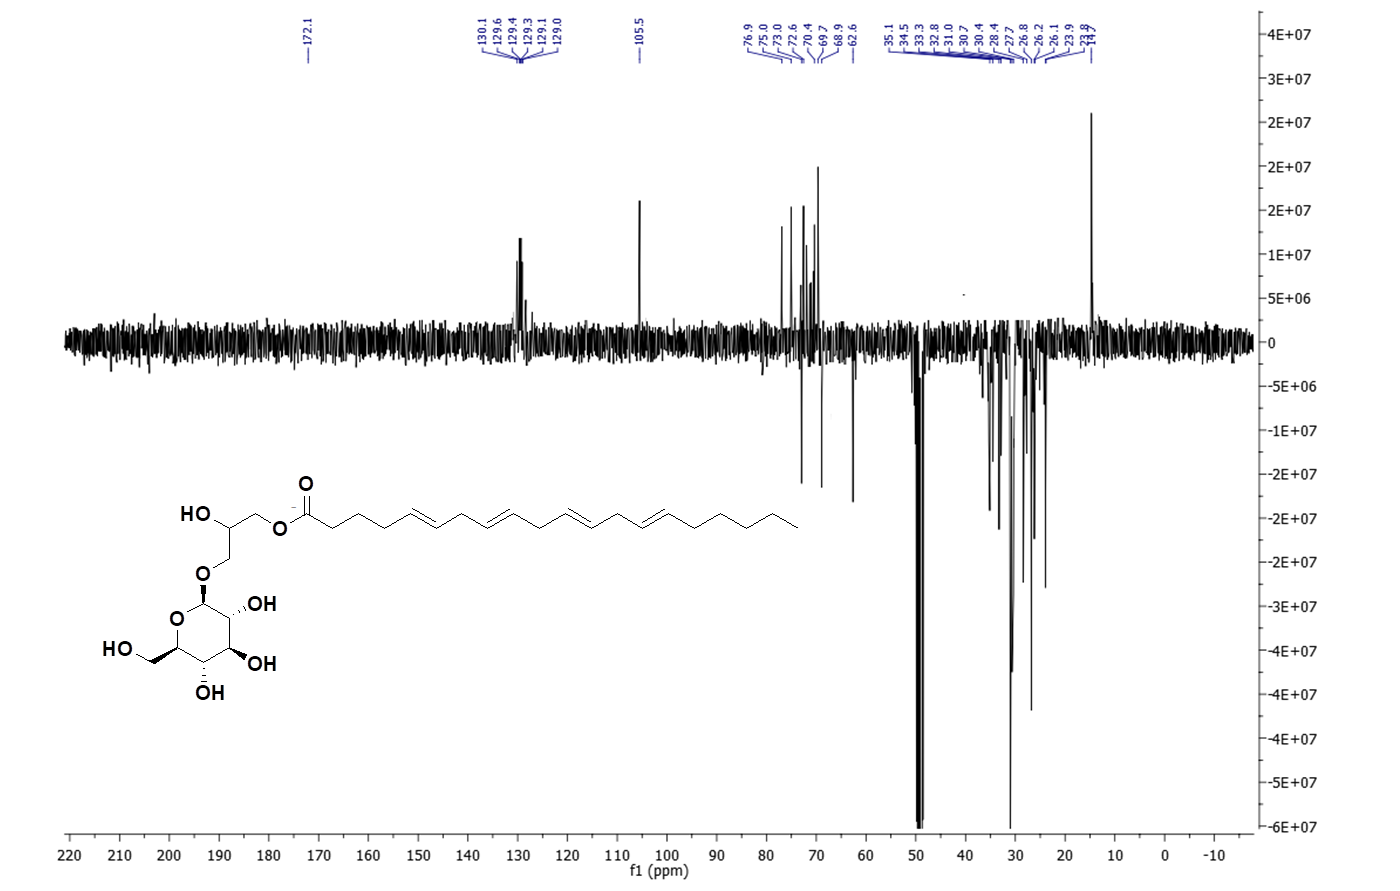


**Figure S24.** DEPT-Q NMR spectrum of compound **19** measured in CD3OD-*d6* at 100 MHz


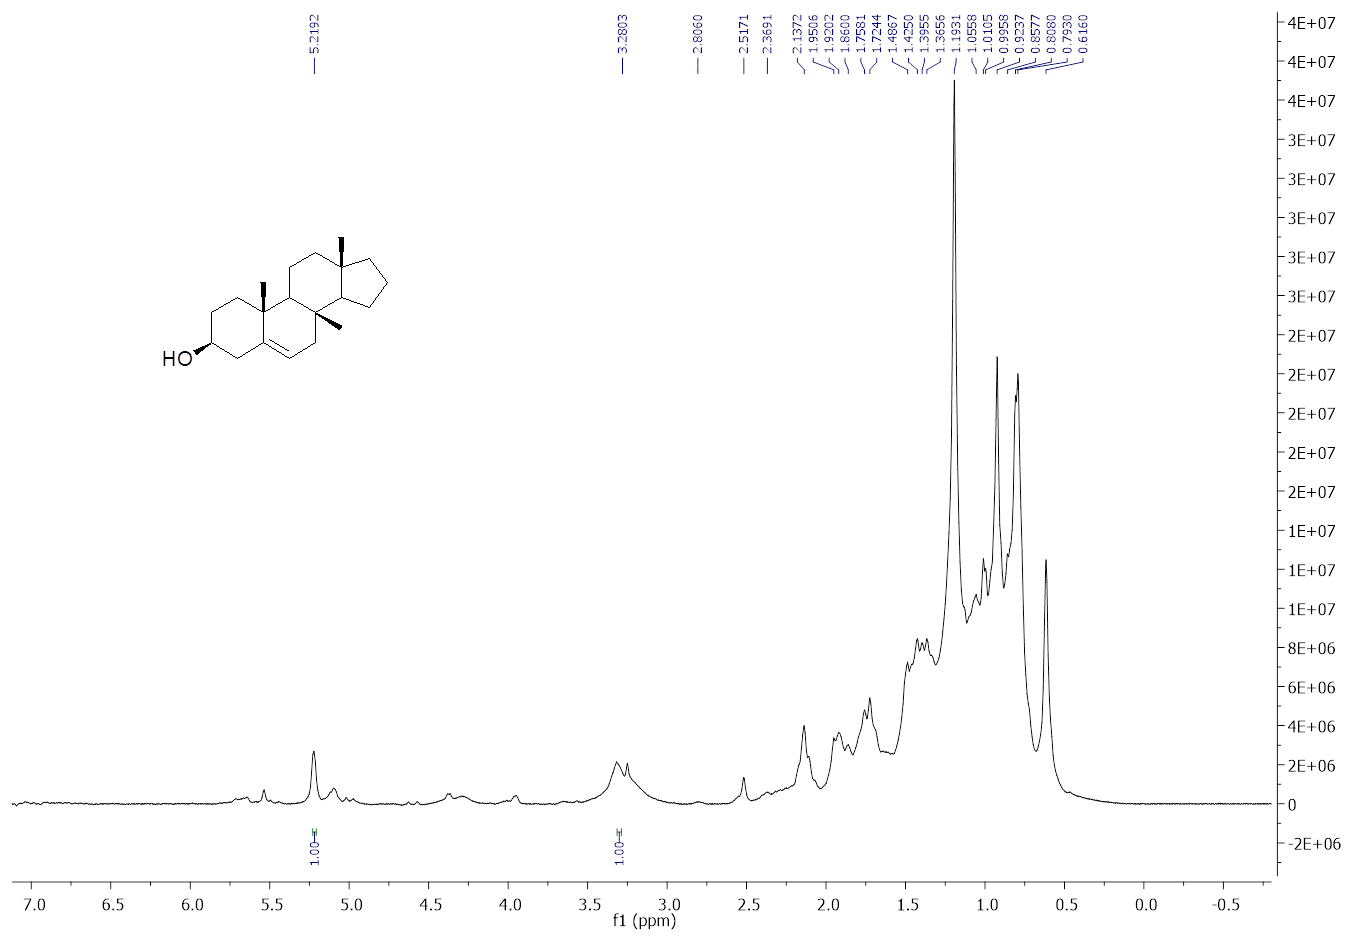


**Figure S25.** 1H NMR spectrum of compound **20** measured in DMSO-*d6* at 400 MHz


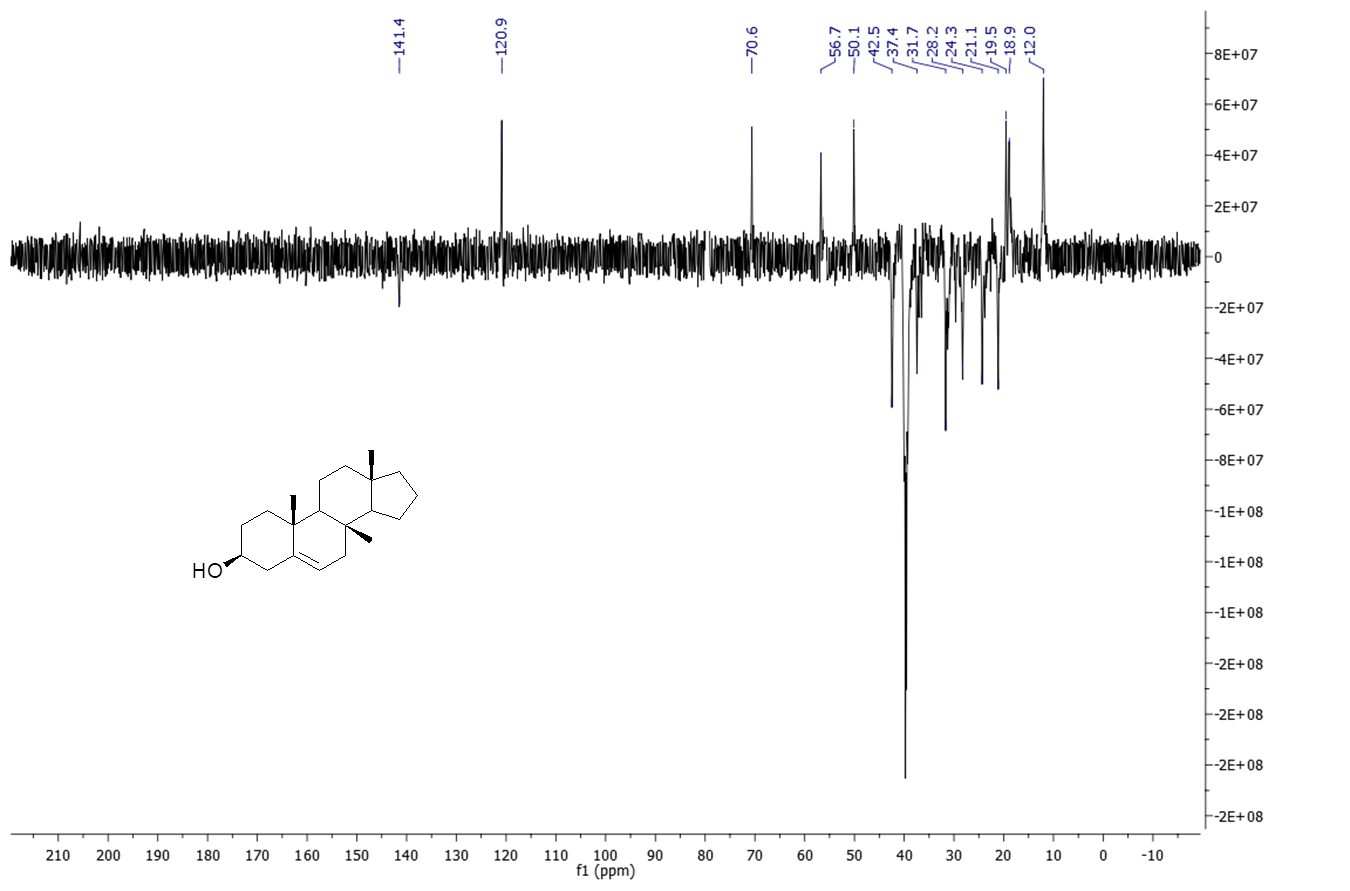


**Figure S26.** DEPT-Q NMR spectrum of compound **20** measured in DMSO-*d6* at 100 MHz


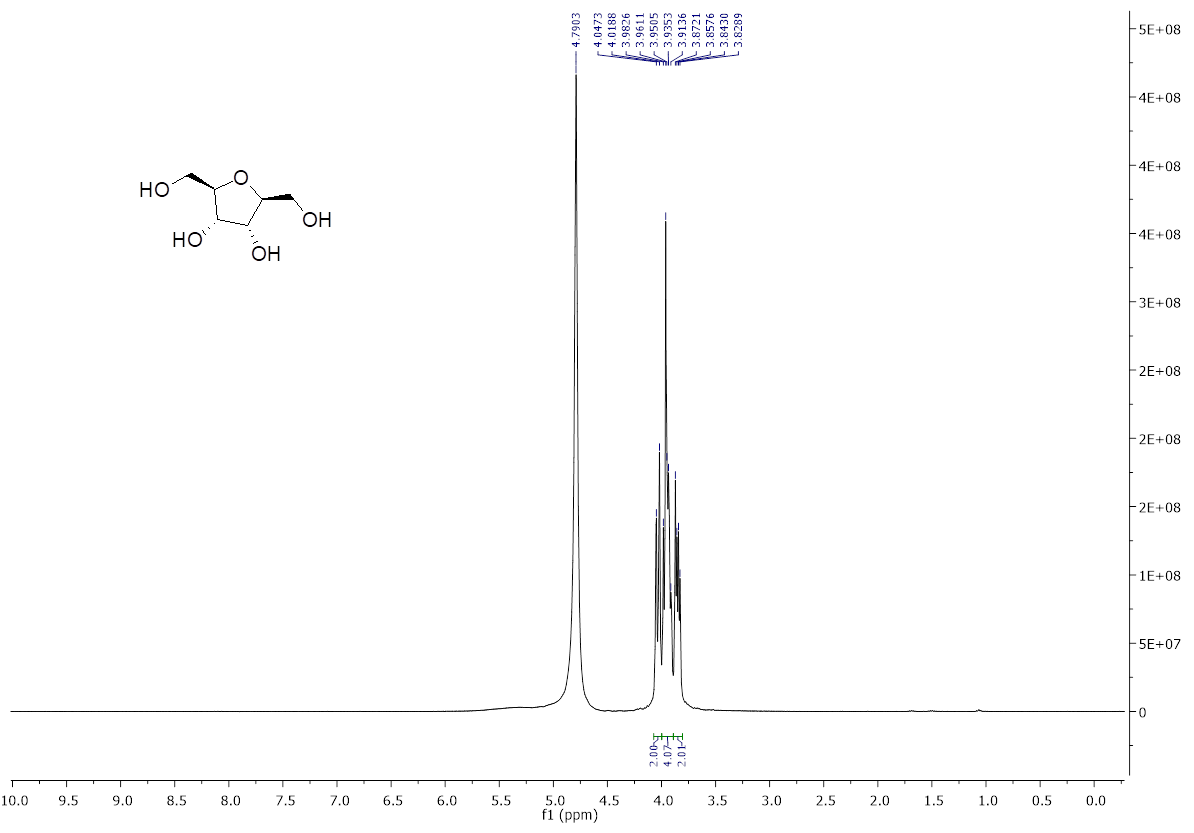


**Figure S27.** 1H NMR spectrum of compound **21** measured in D2O at 400 MHz


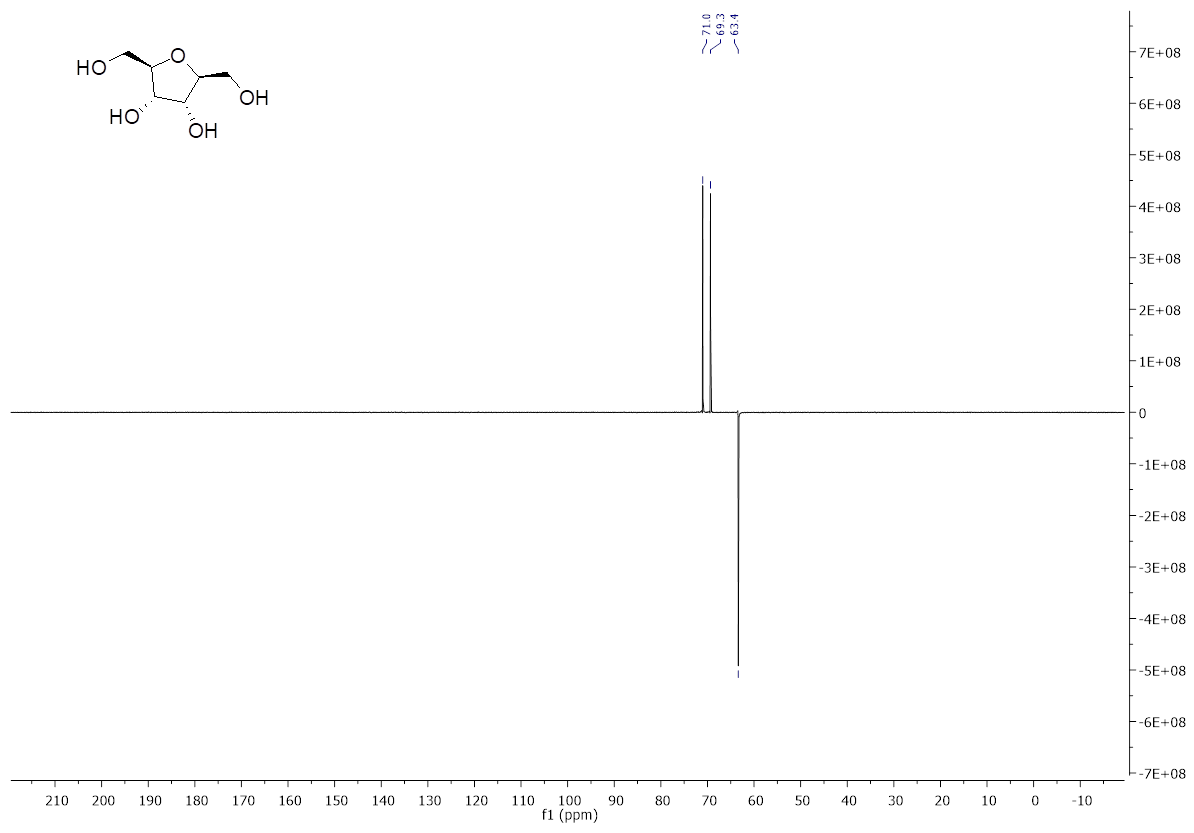


**Figure S28.** DEPT-Q NMR spectrum of compound **21** measured in D2O at 100 MHz
